# Supplementary material
Source: PubMed Central journal article supplement (PMC6133304)

# Age at Menarche (Perry 2014)

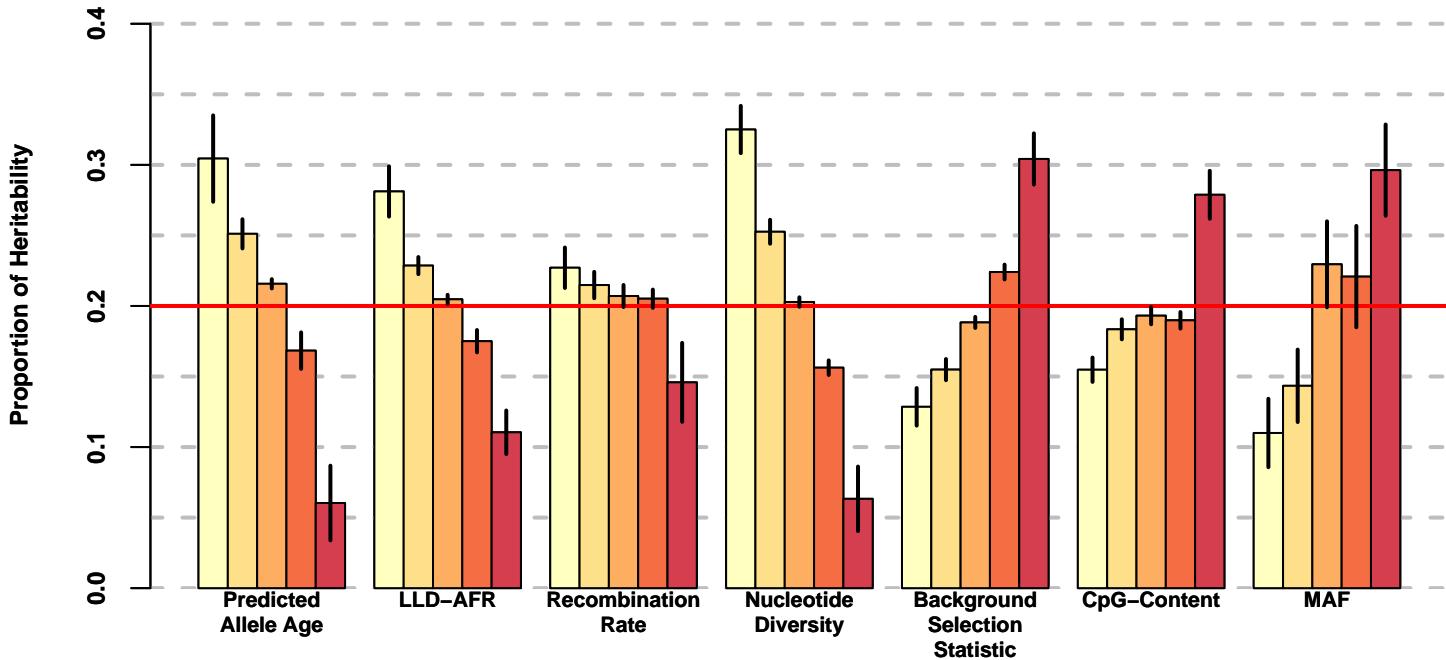

# Age at Menarche (UK Biobank)

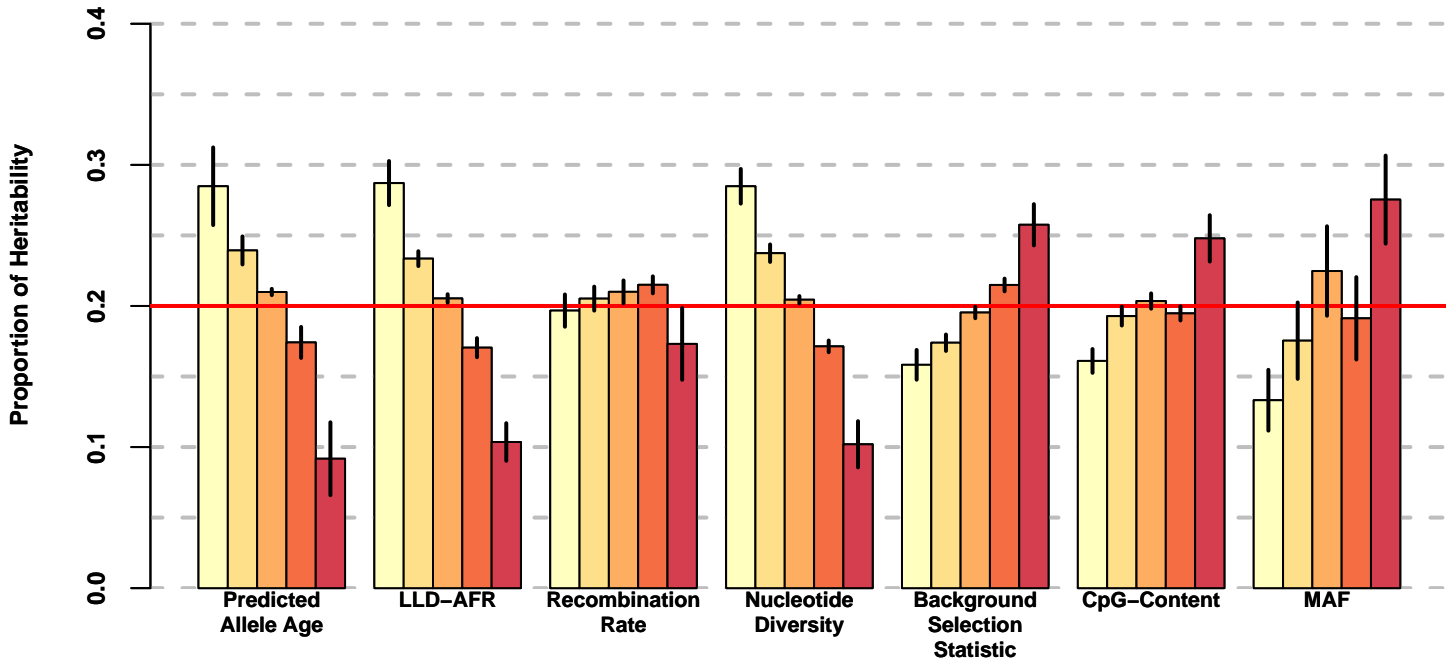

# Age at Menopause (Day 2015)

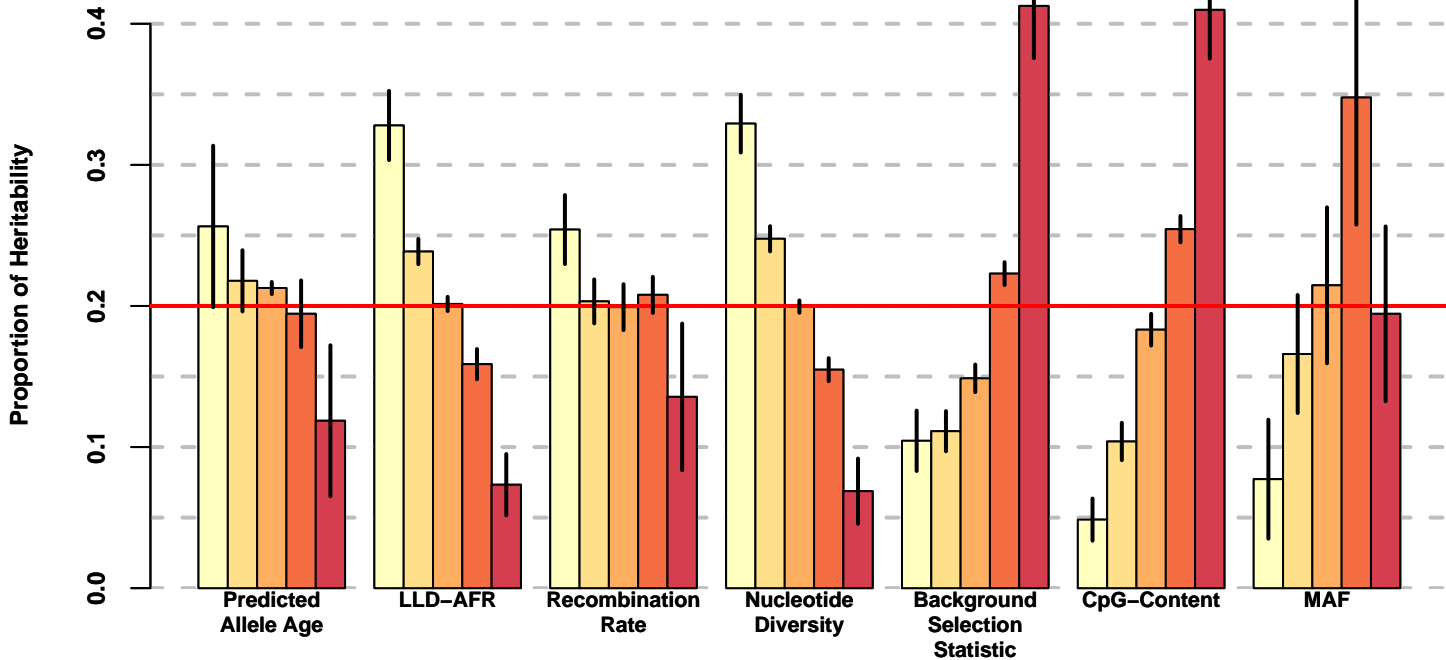

# Age at Menopause (UK Biobank)

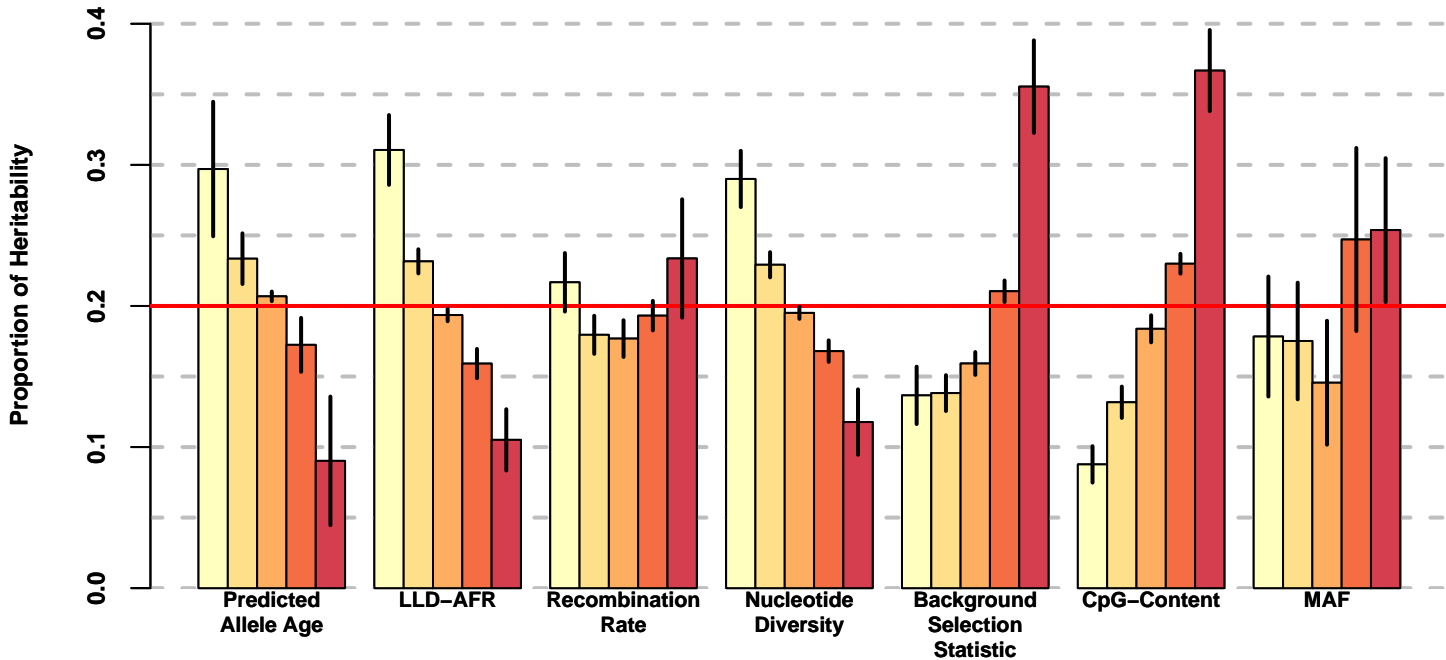

# Anorexia

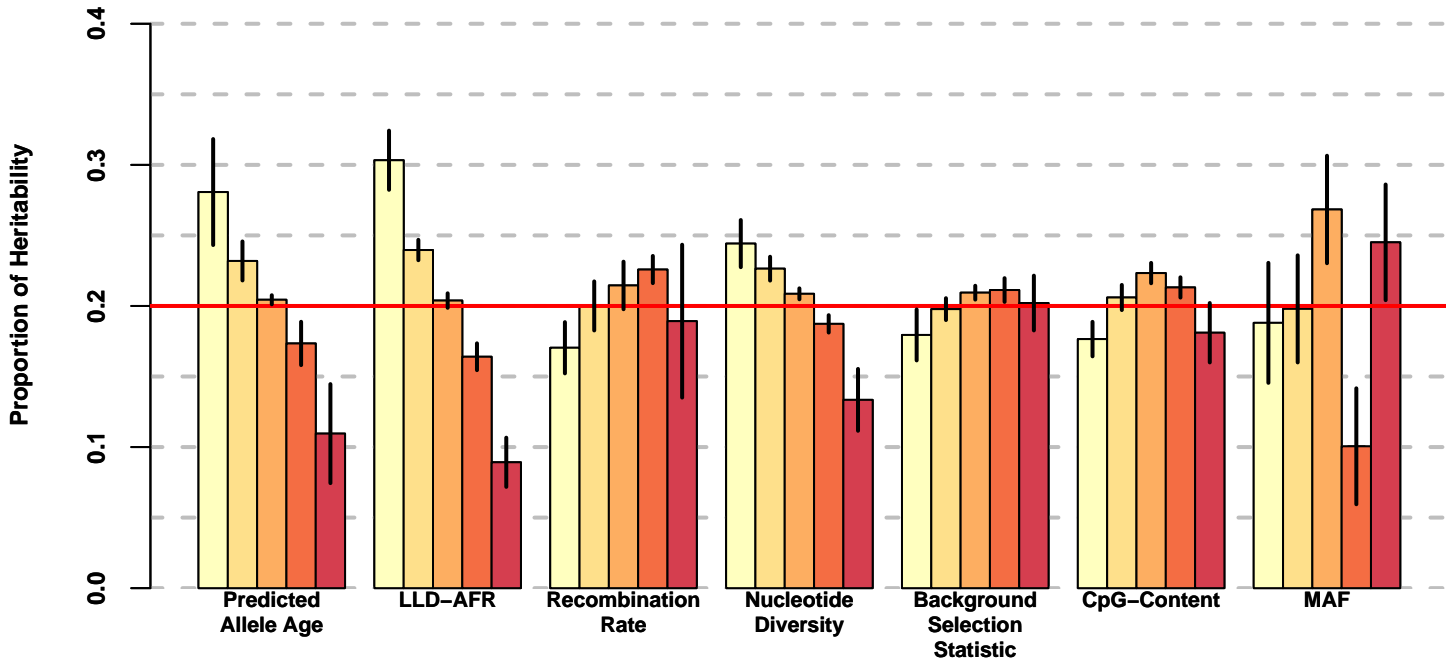

# Asthma

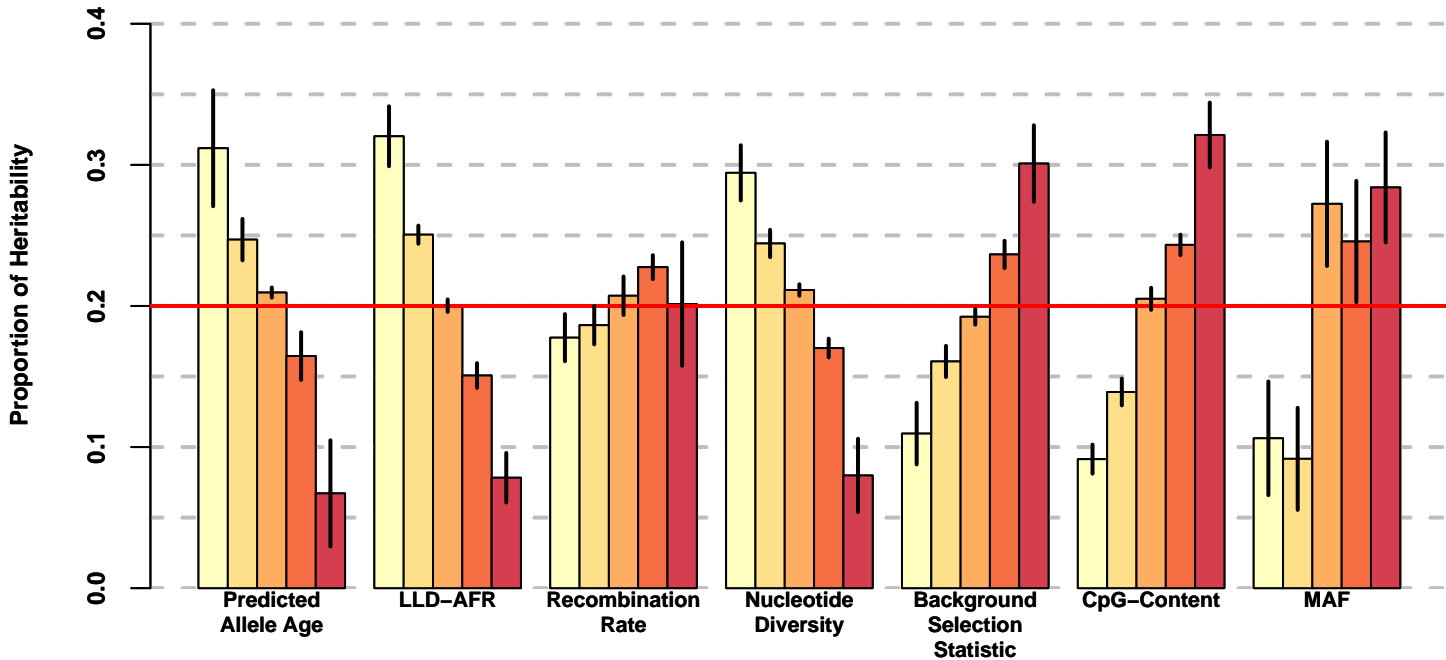

# Autism Spectrum

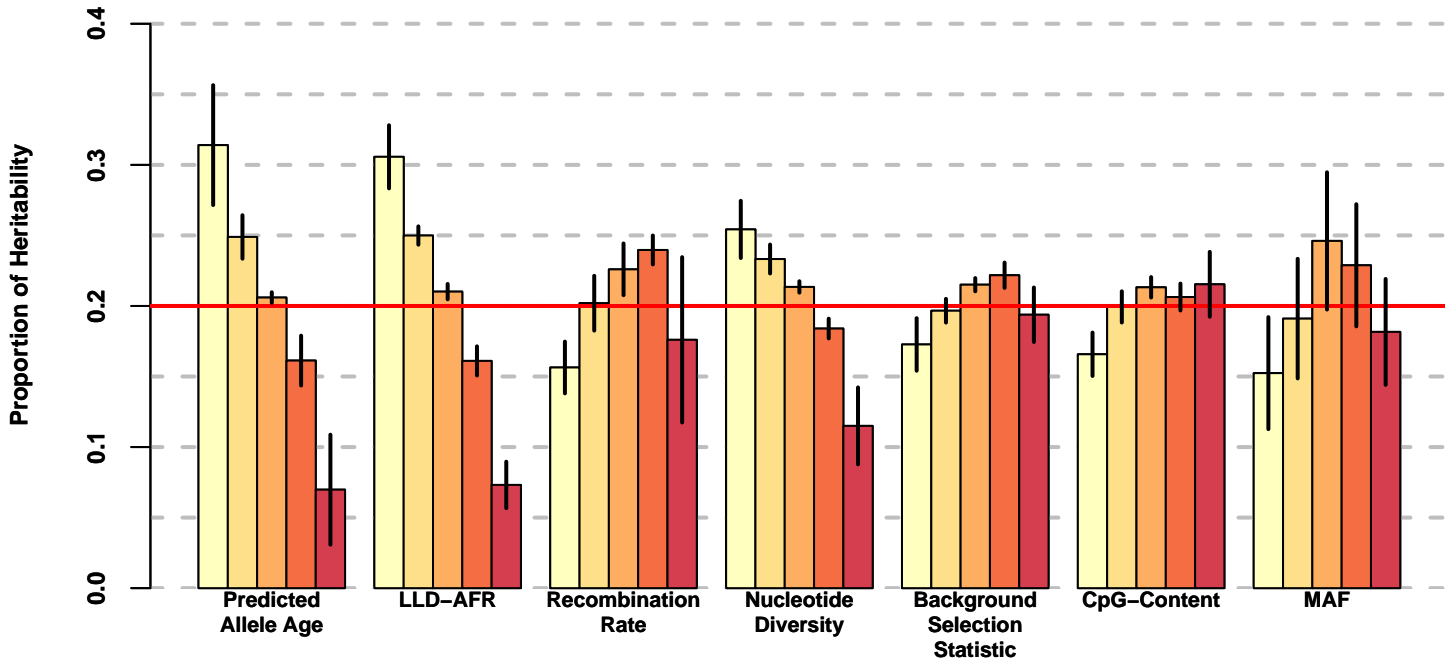

# Bipolar Disorder

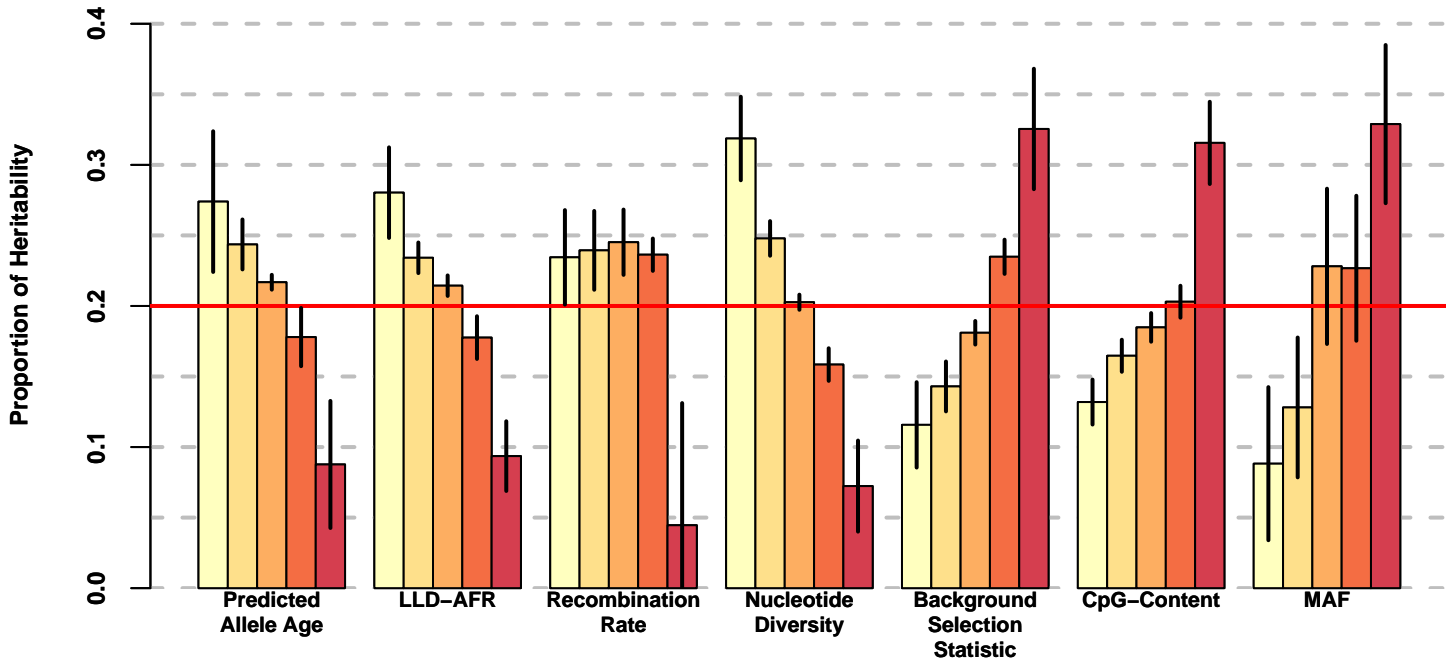



## Blood pressure (Diastolic)

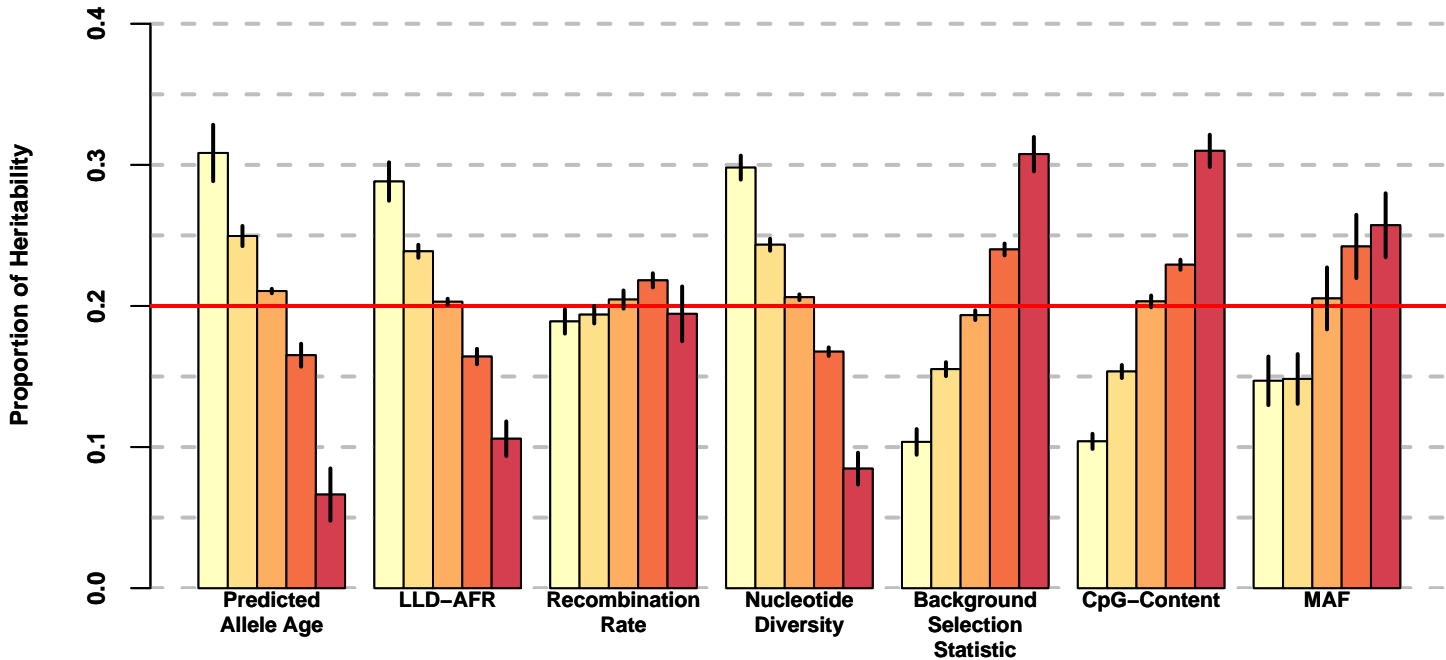

# Blood pressure (Systolic)

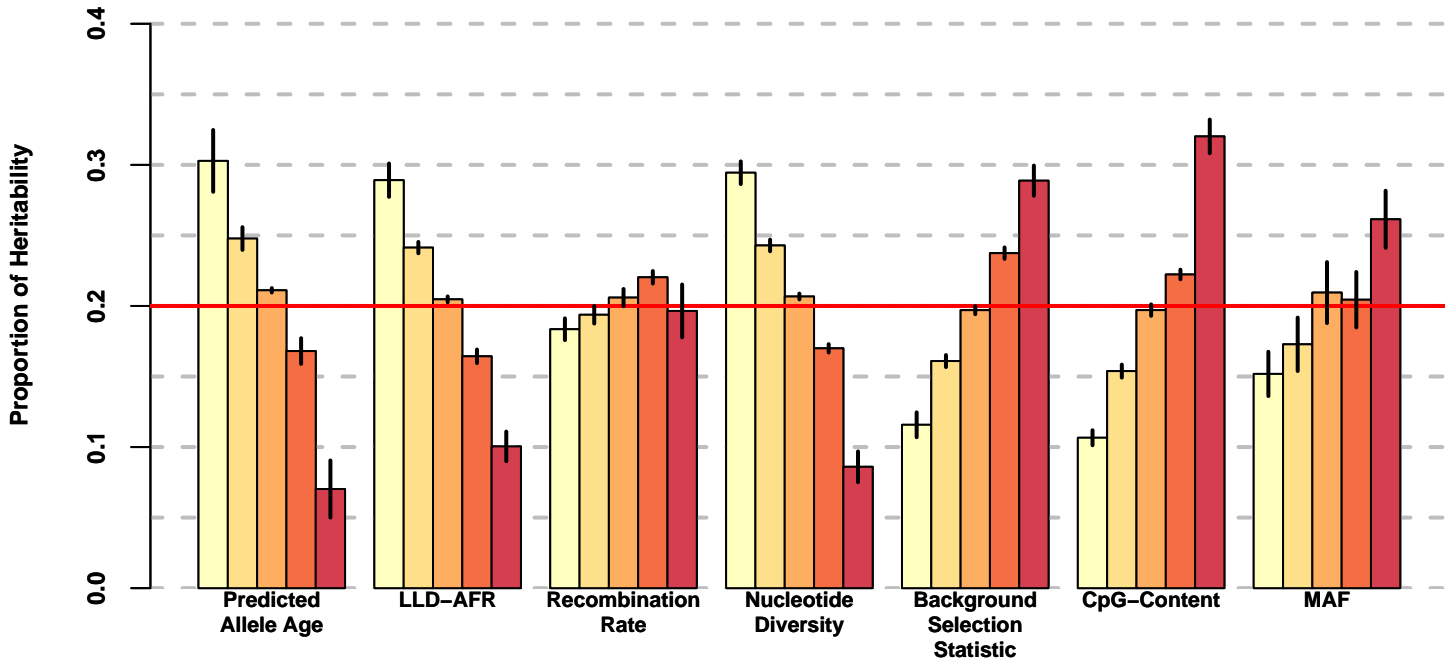

# BMI (Speliotes 2010)

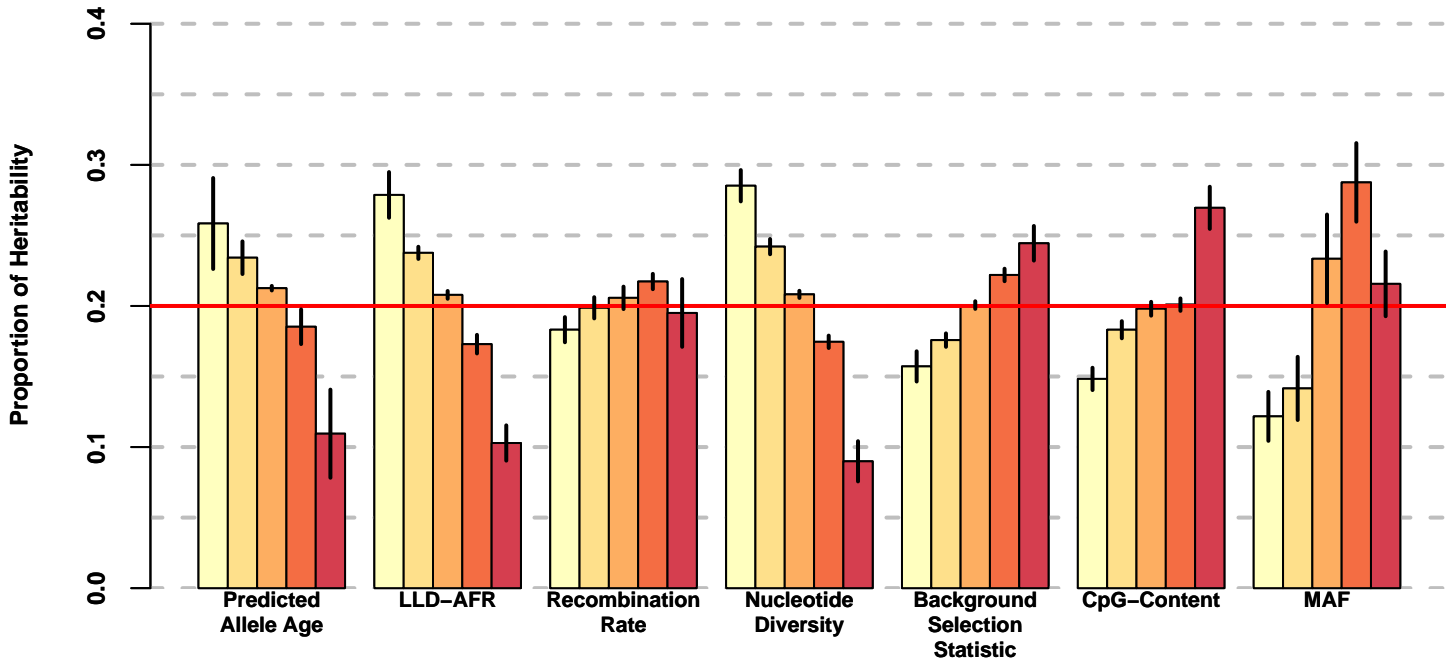

# BMI (UK Biobank)

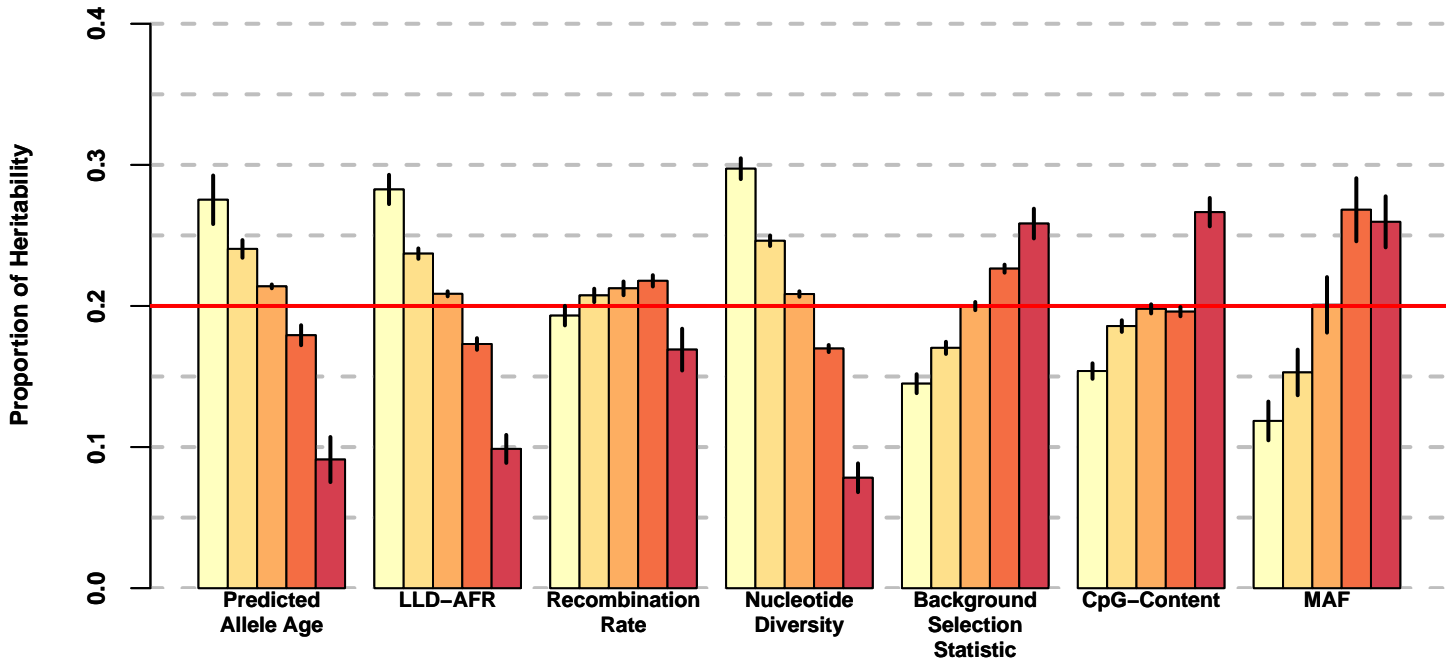

# Celiac Disease

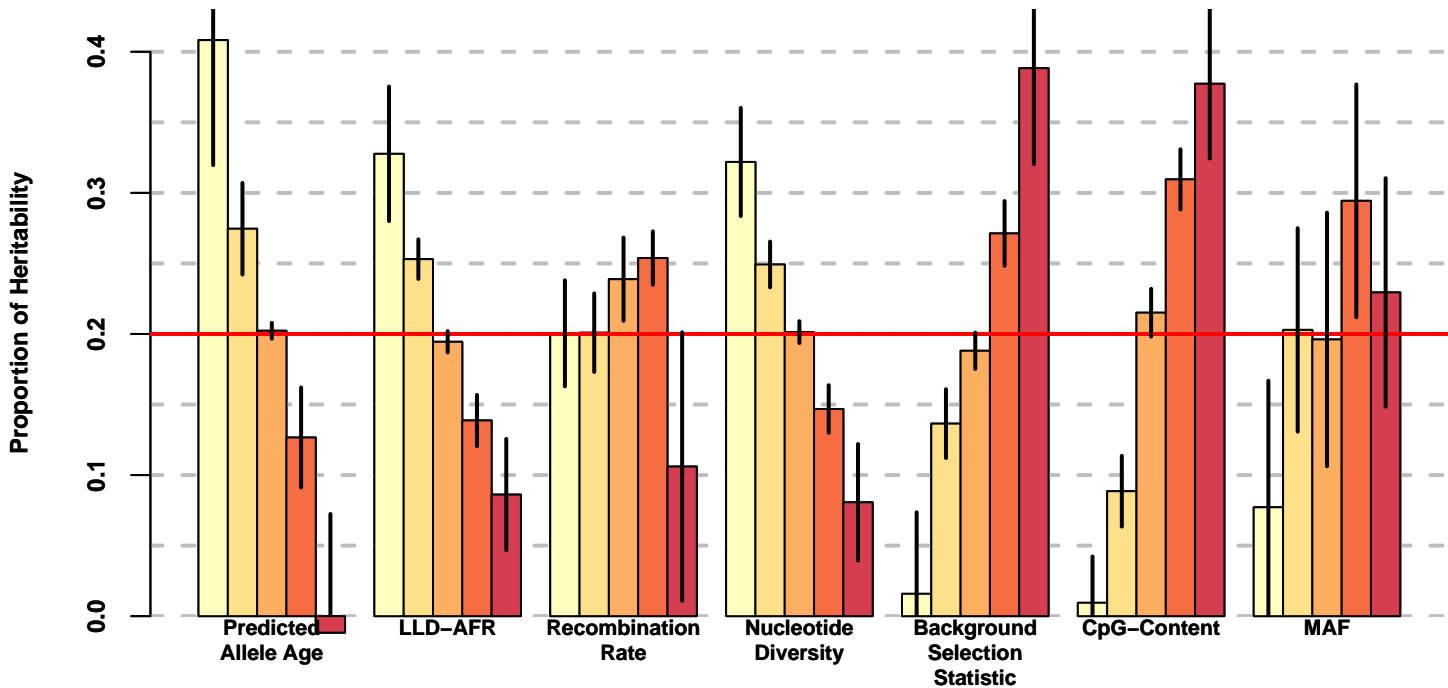

# Chin dimple

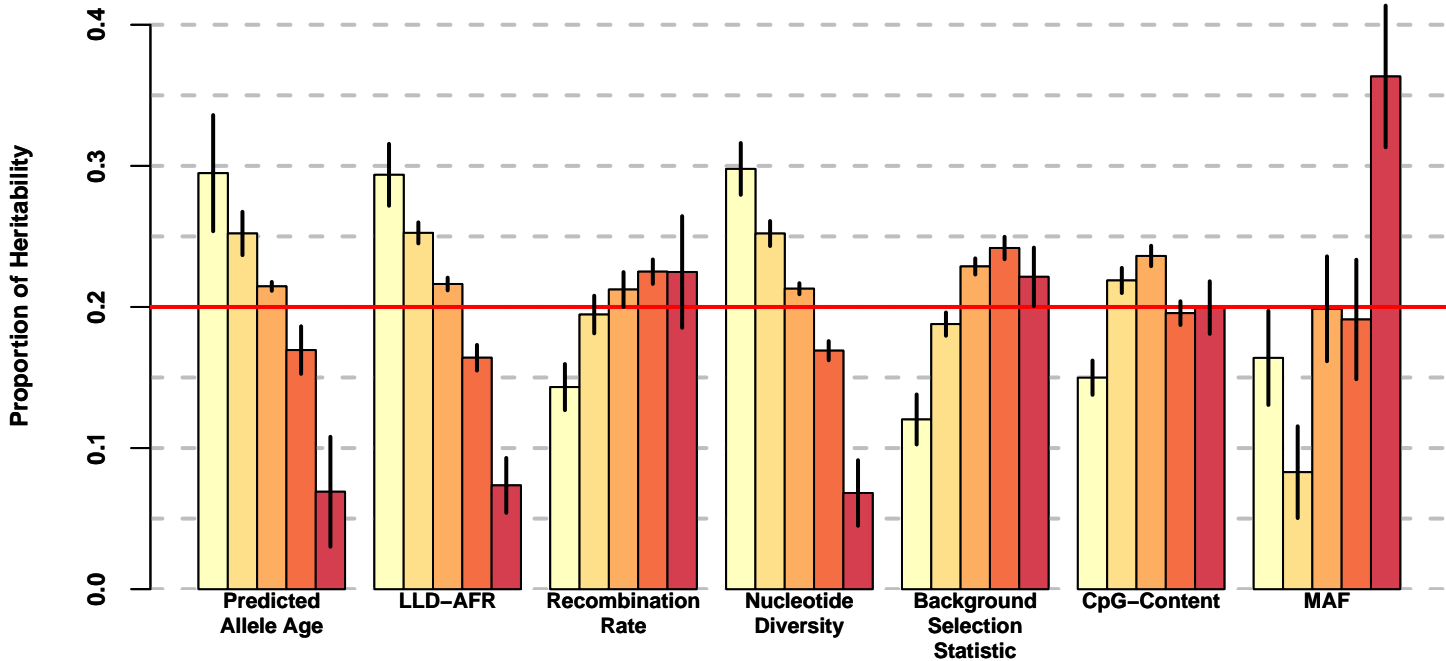

# College Education

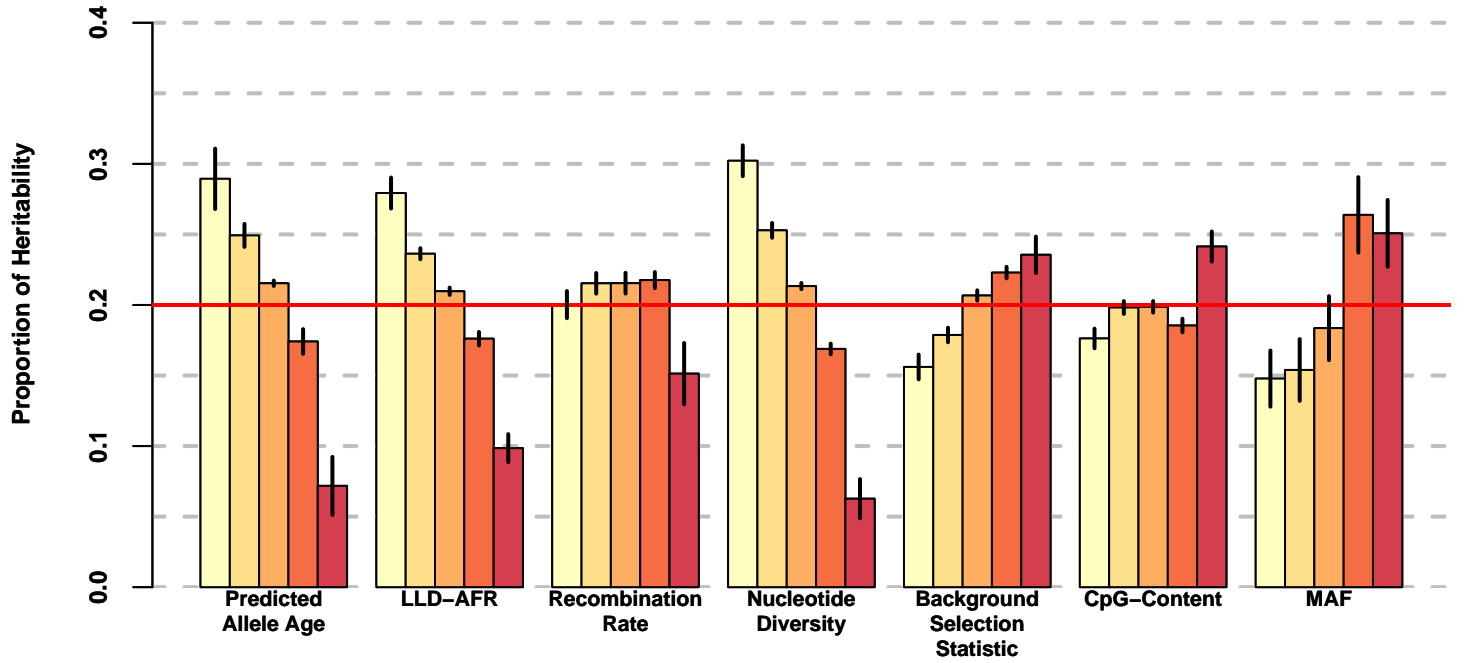

# Coronary Artery Disease

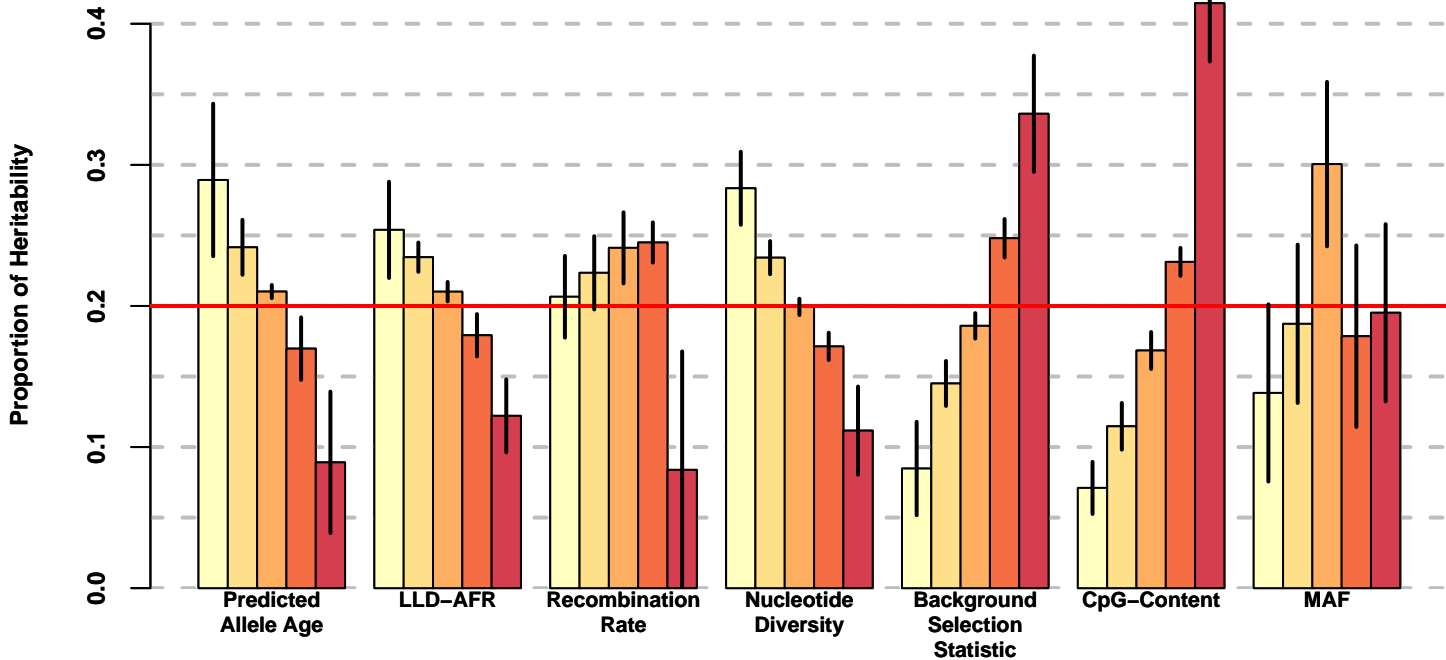



# Crohn's Disease

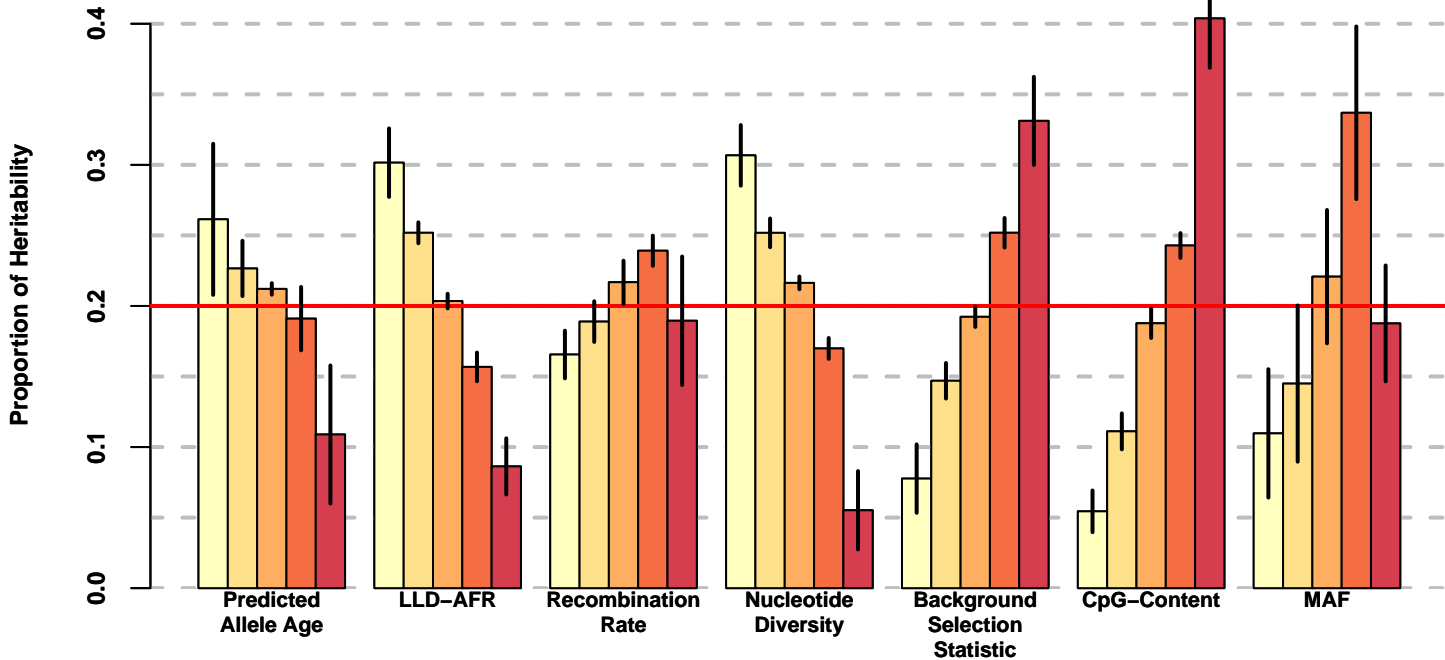

# Depressive symptoms

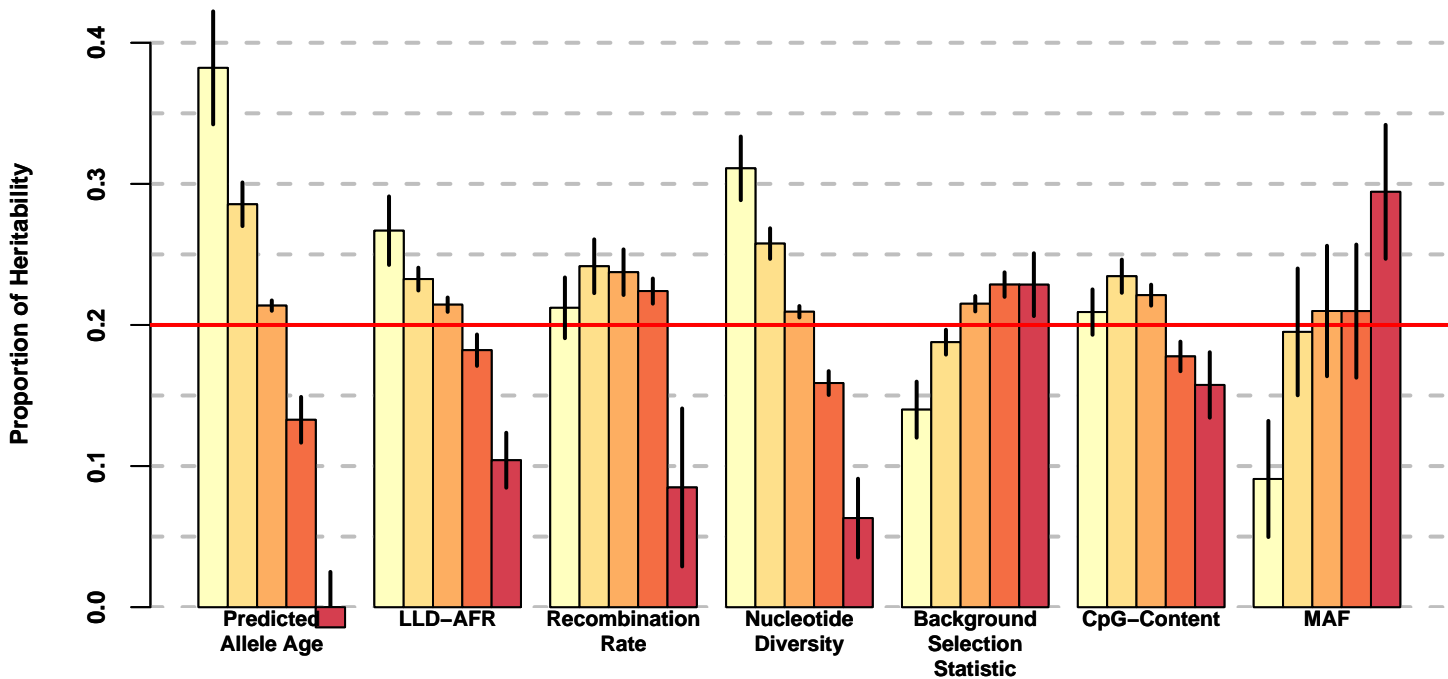

# Dimples

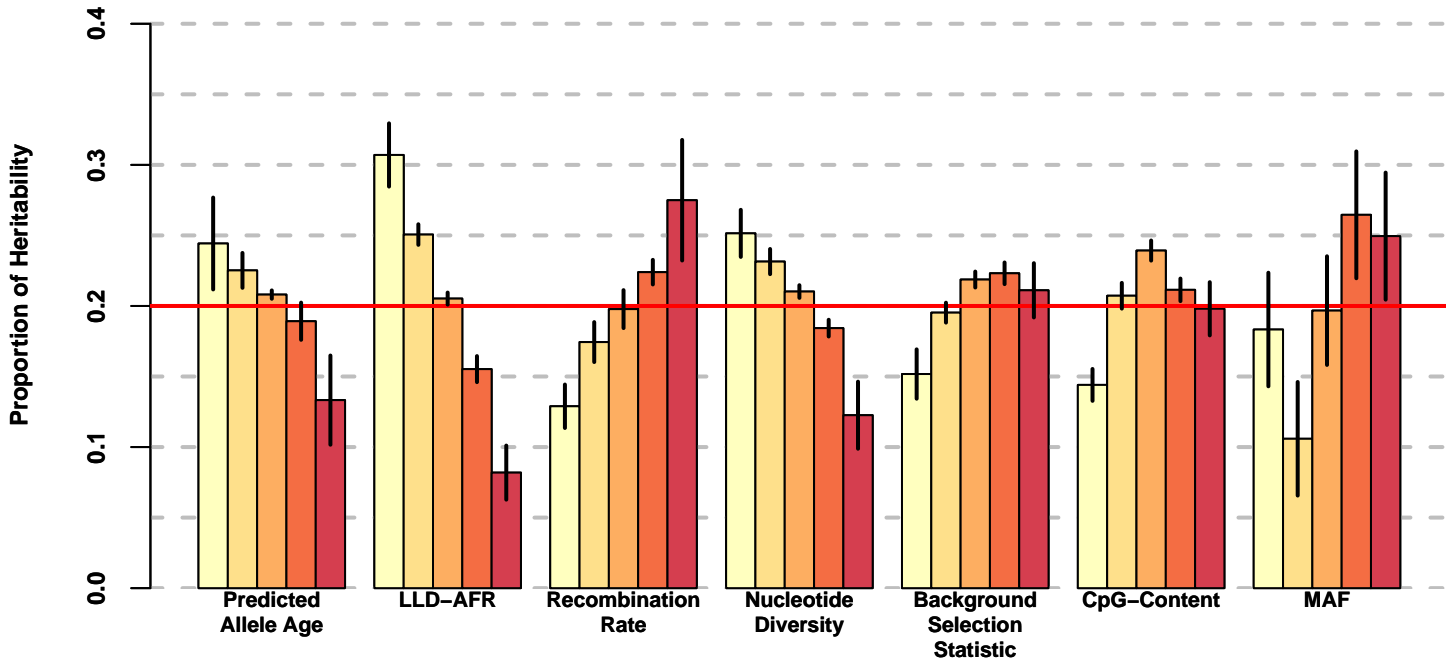

# Eczema

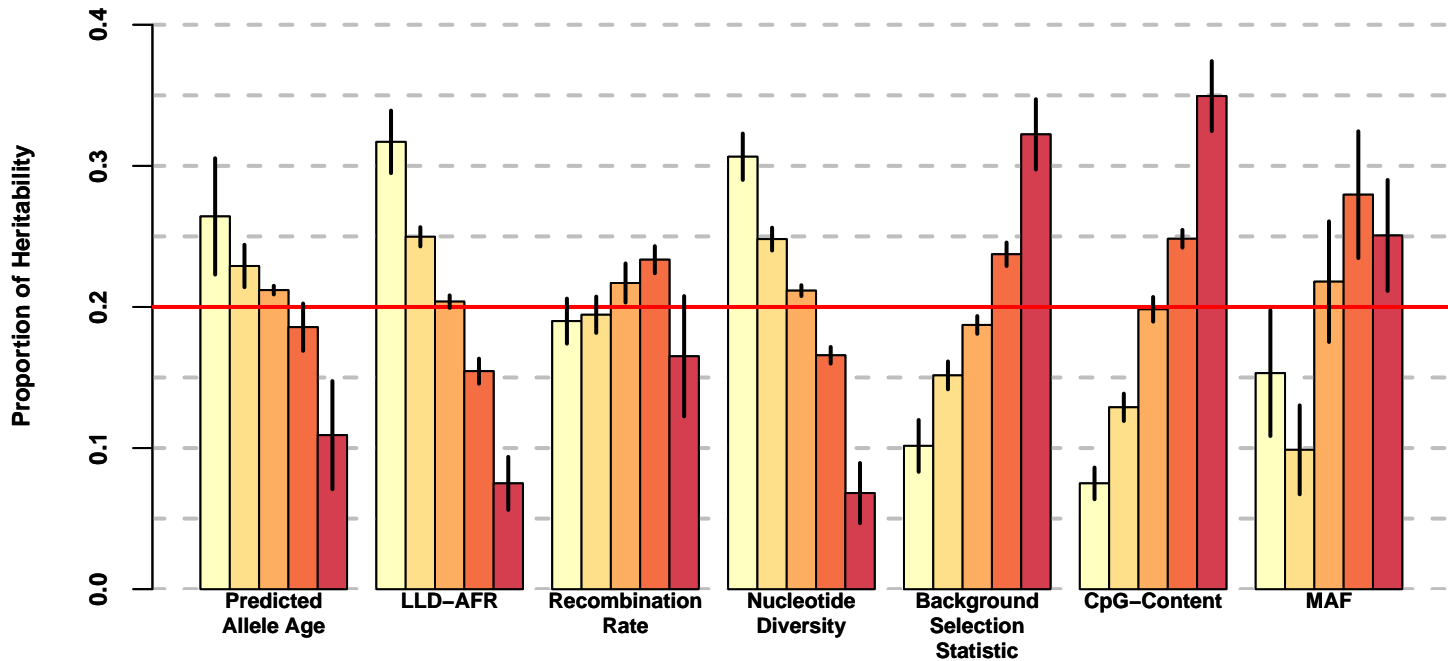

# Ever Smoked

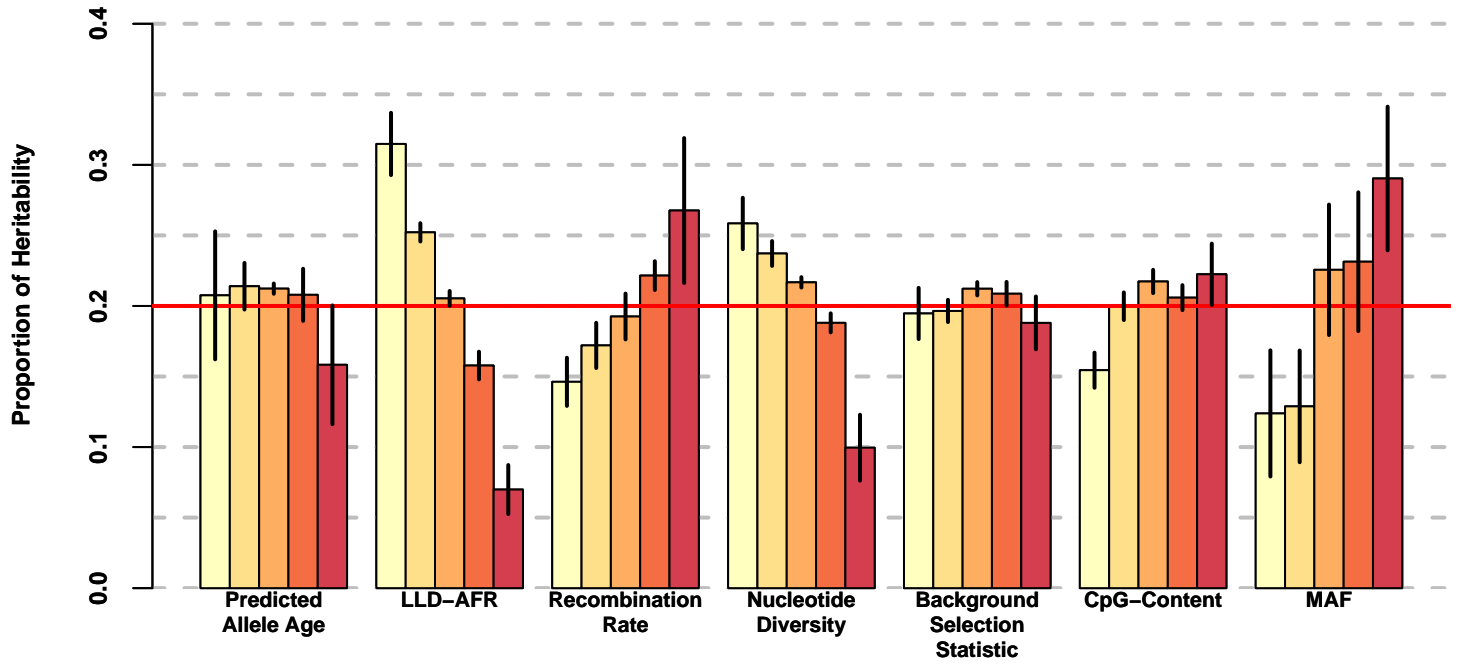

# Fasting Glucose

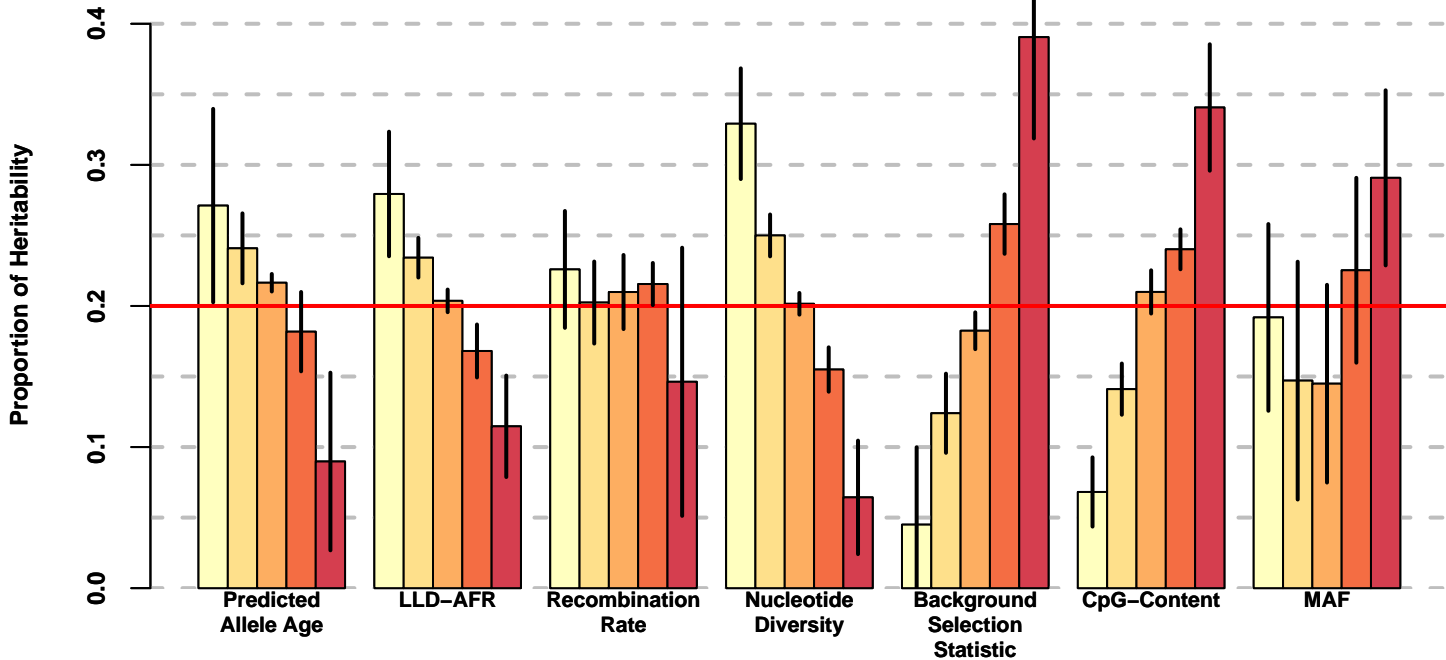

# Female breast cup size

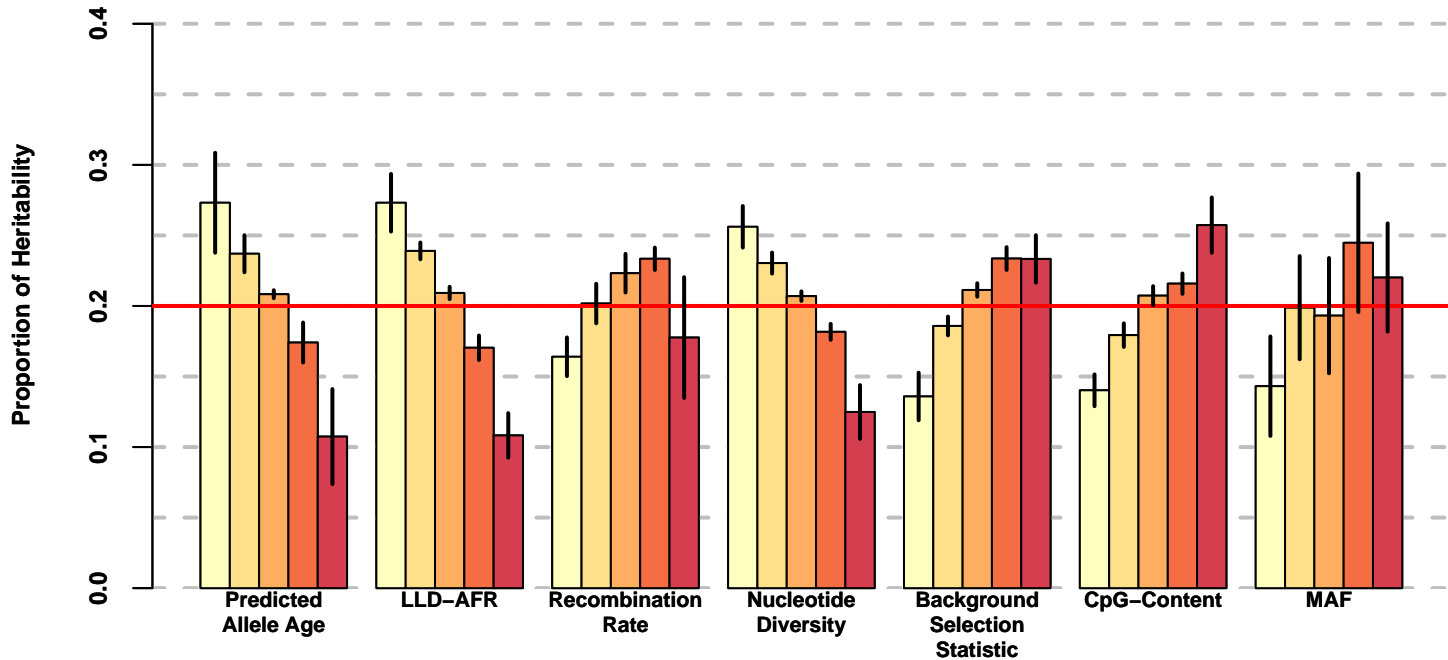

# Female hair loss

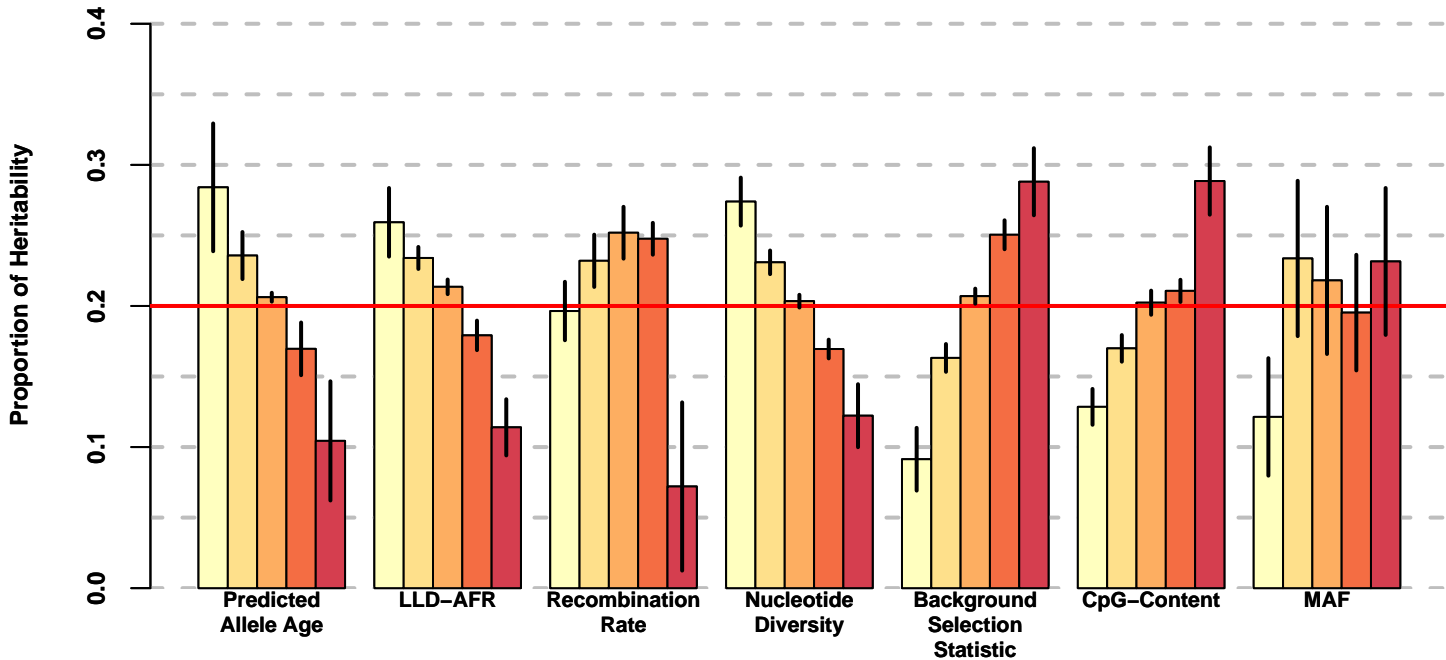



# Gray hair amount

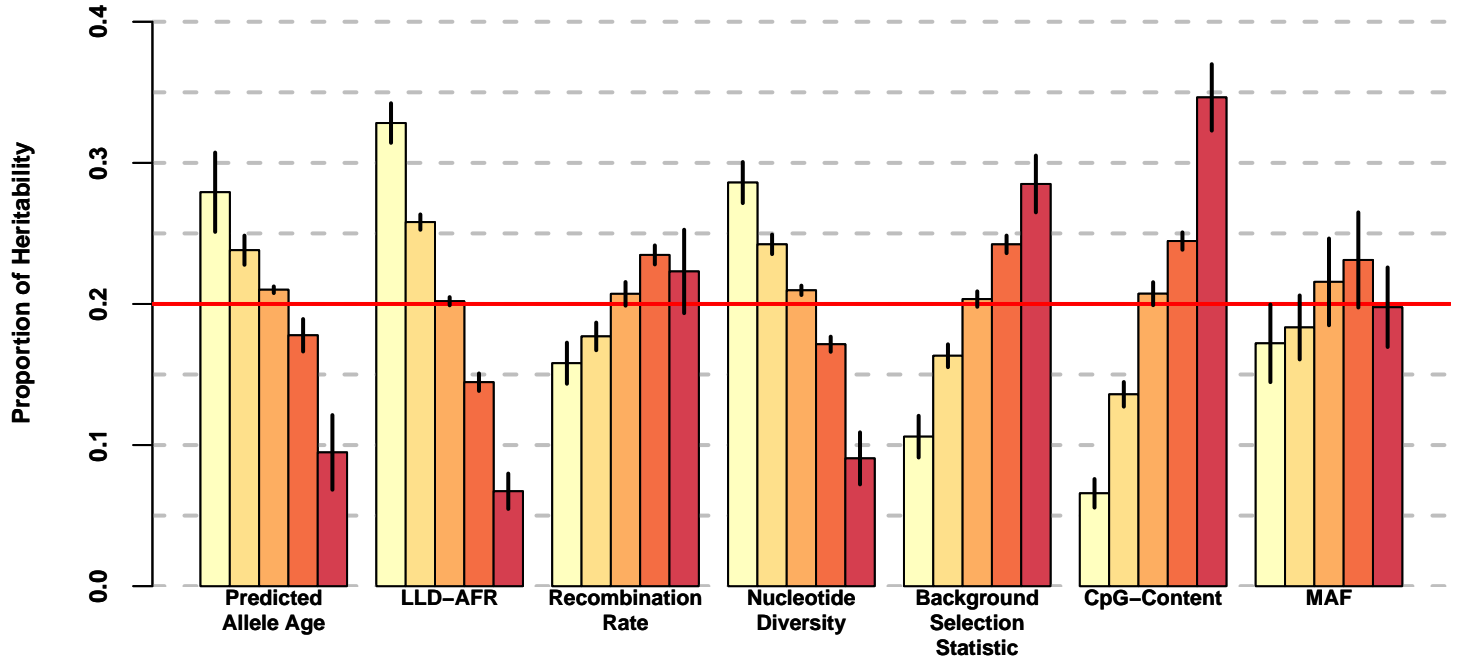

# Hair color

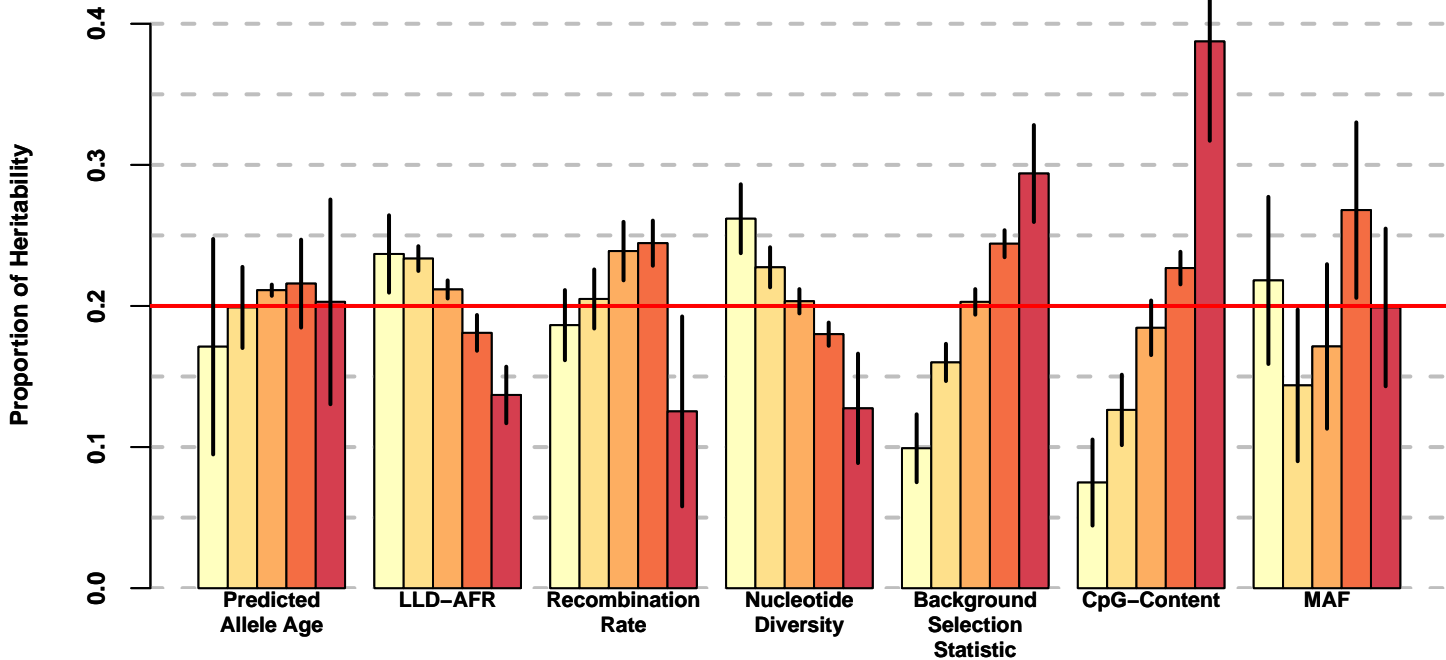

# Hair curl

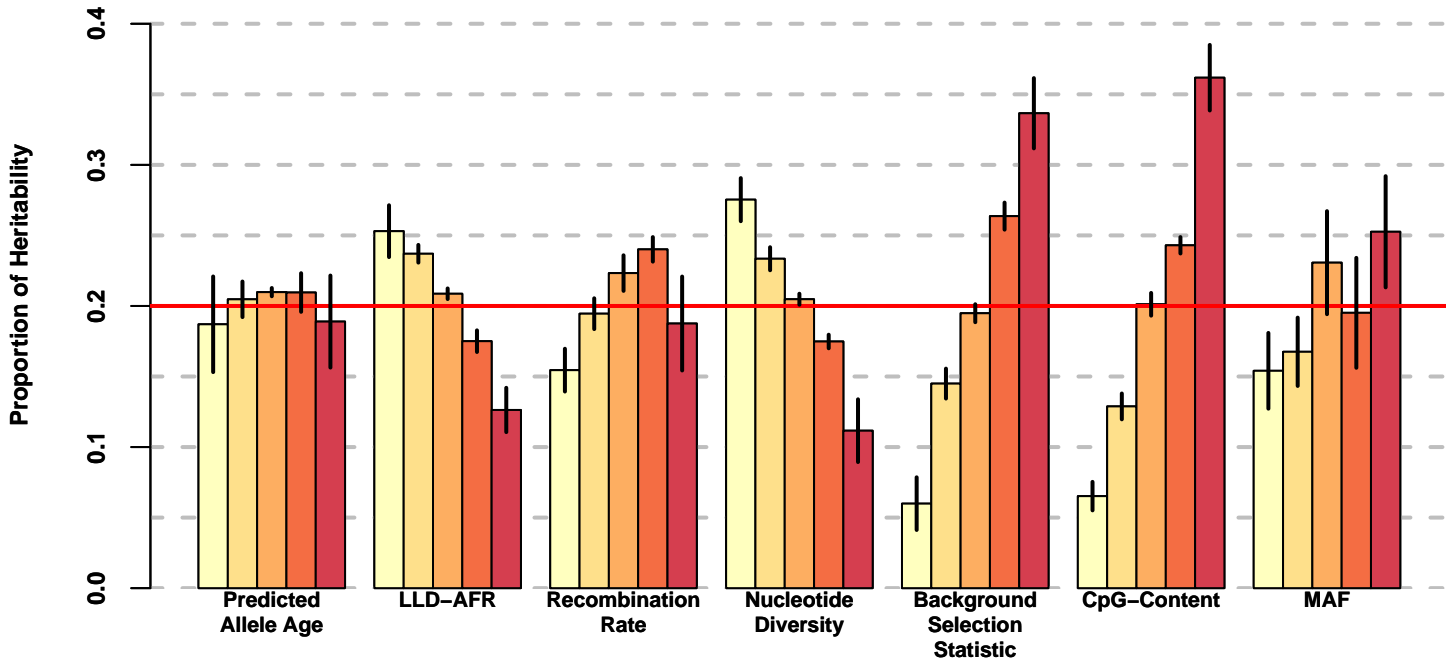

# HbA1C

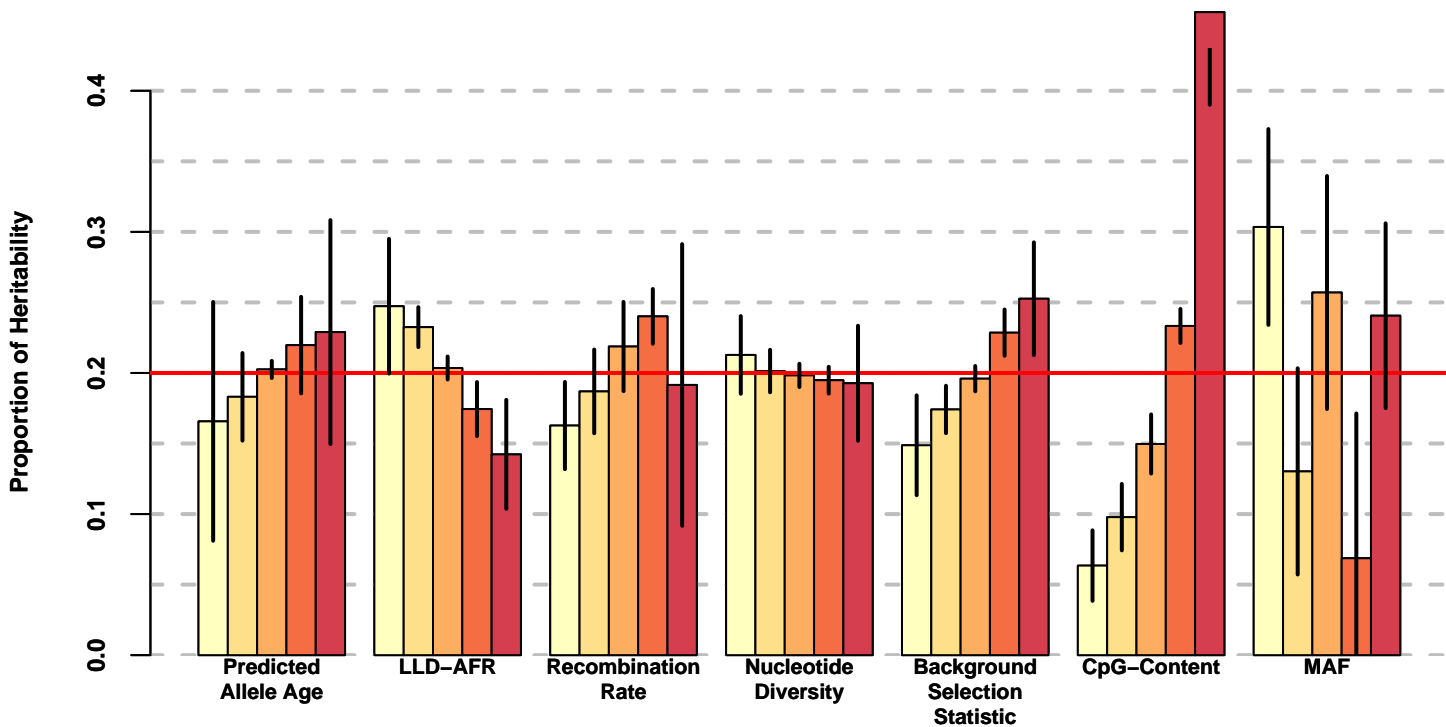

# HDL

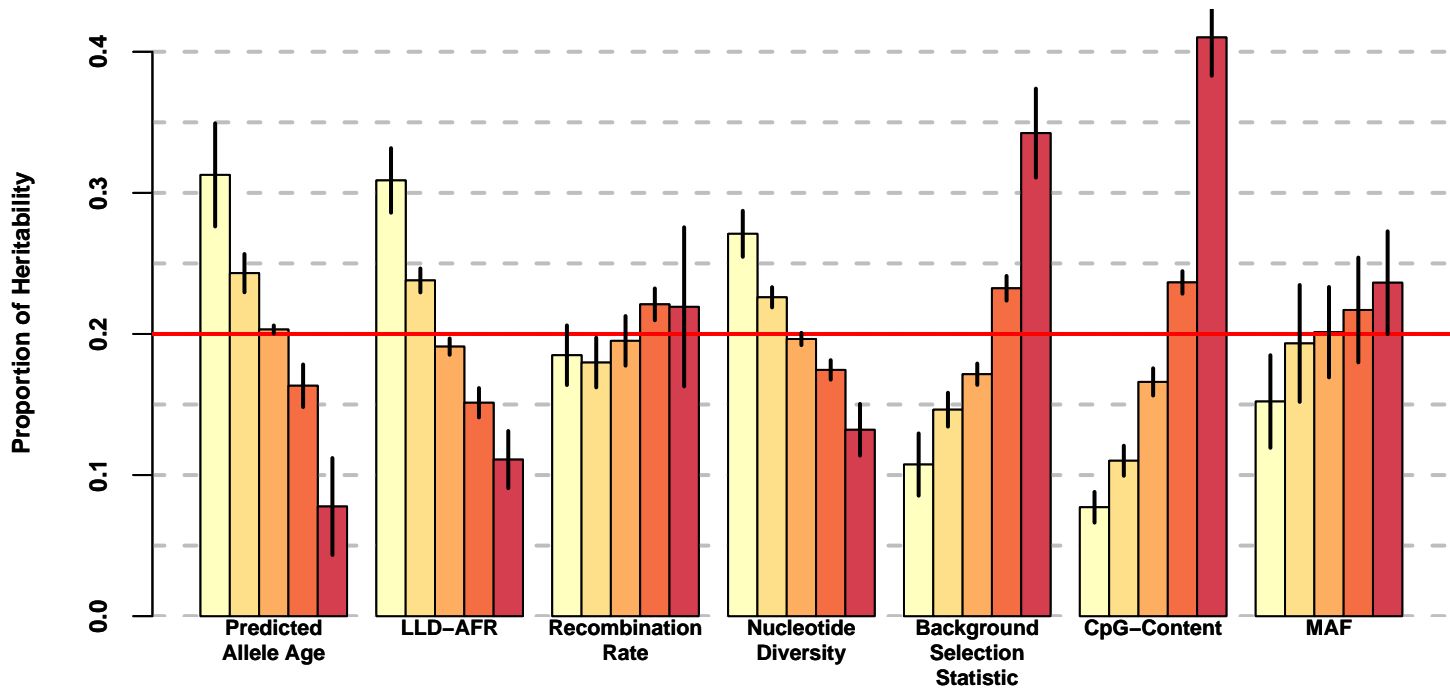

# Heel T-Score

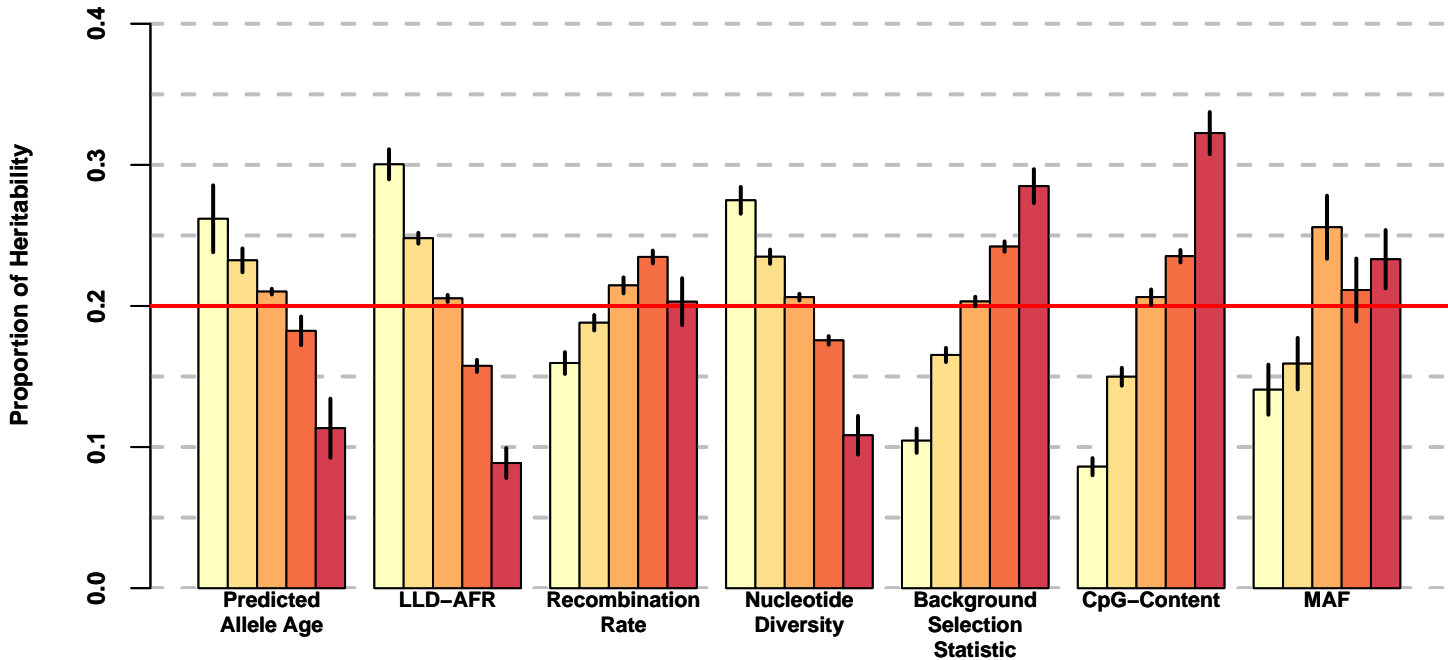

# Height (23andMe)

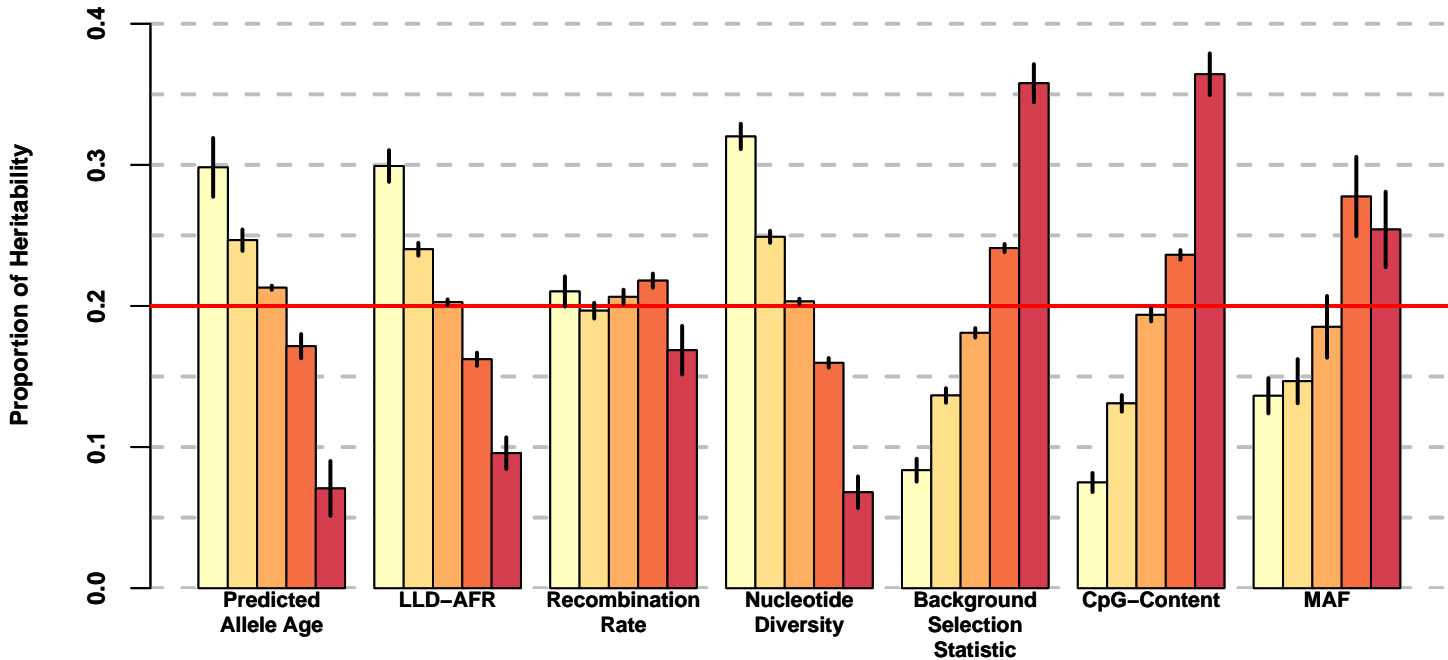

# Height (Lango Allen 2010)

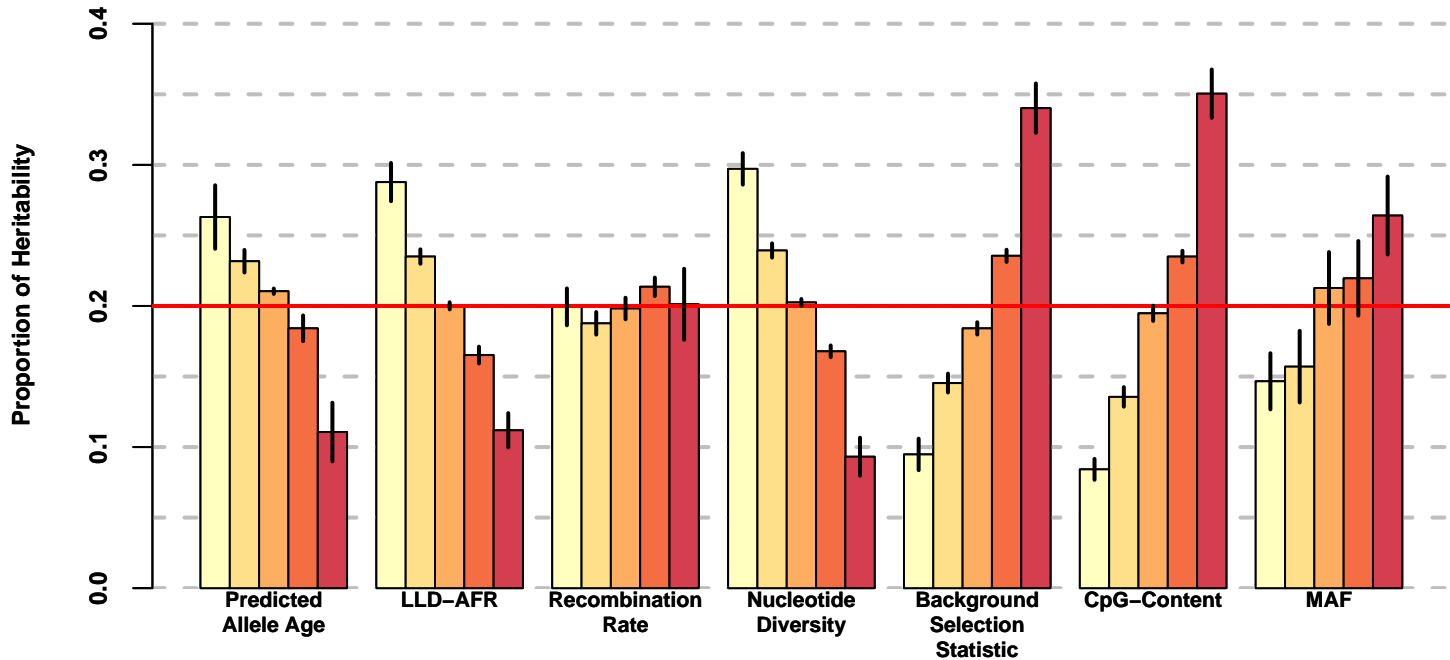



# Height (UK Biobank)

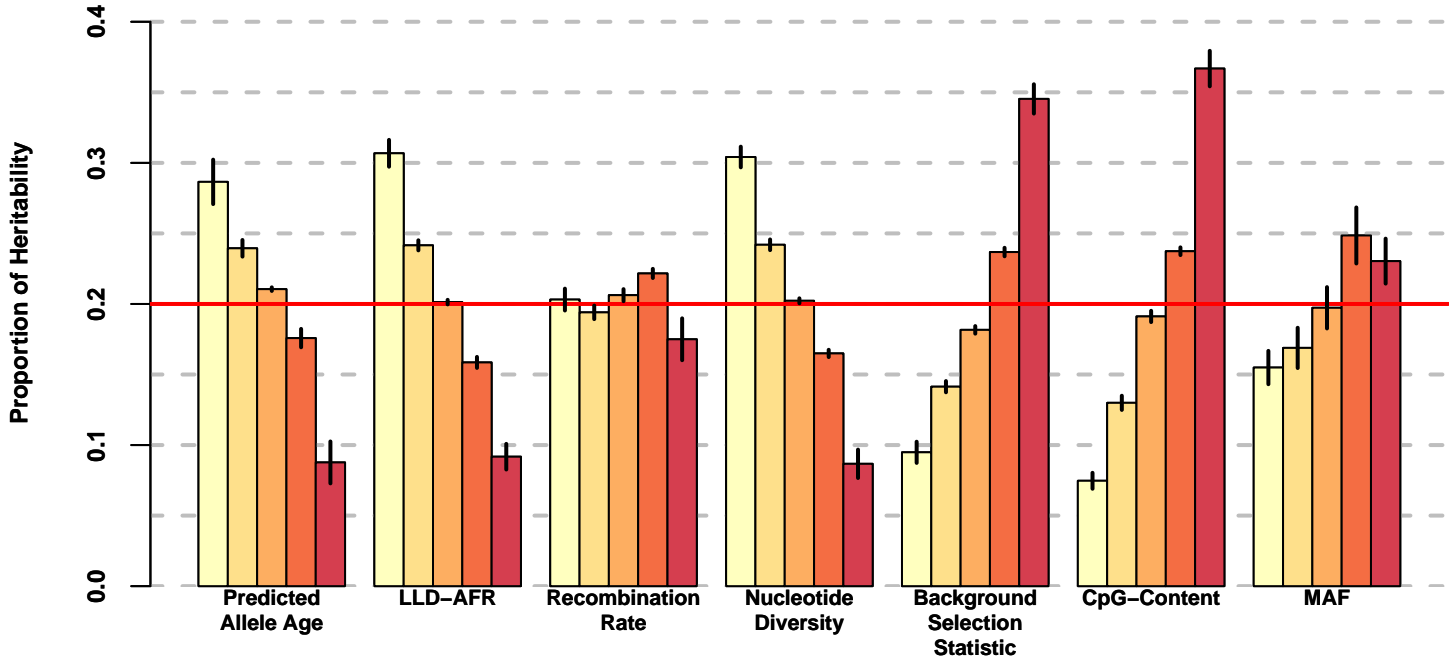

# Hypermobility

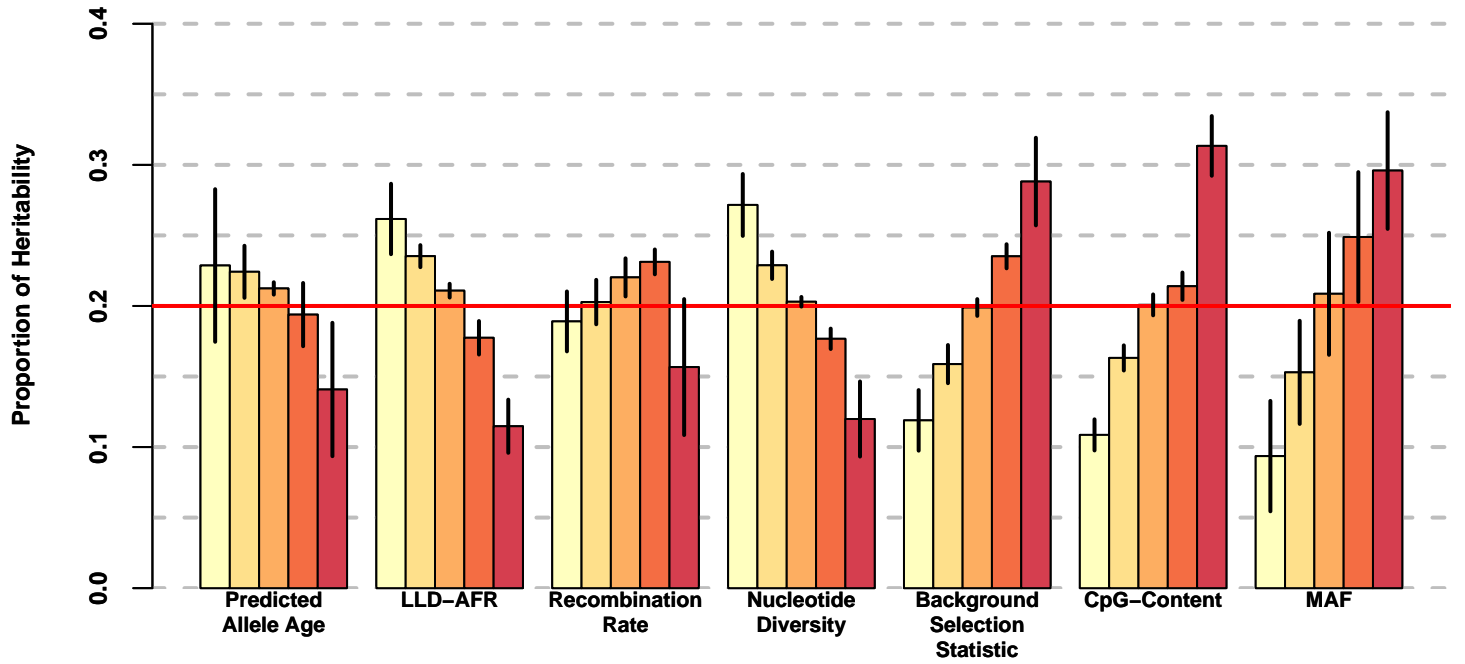

# Hypertension

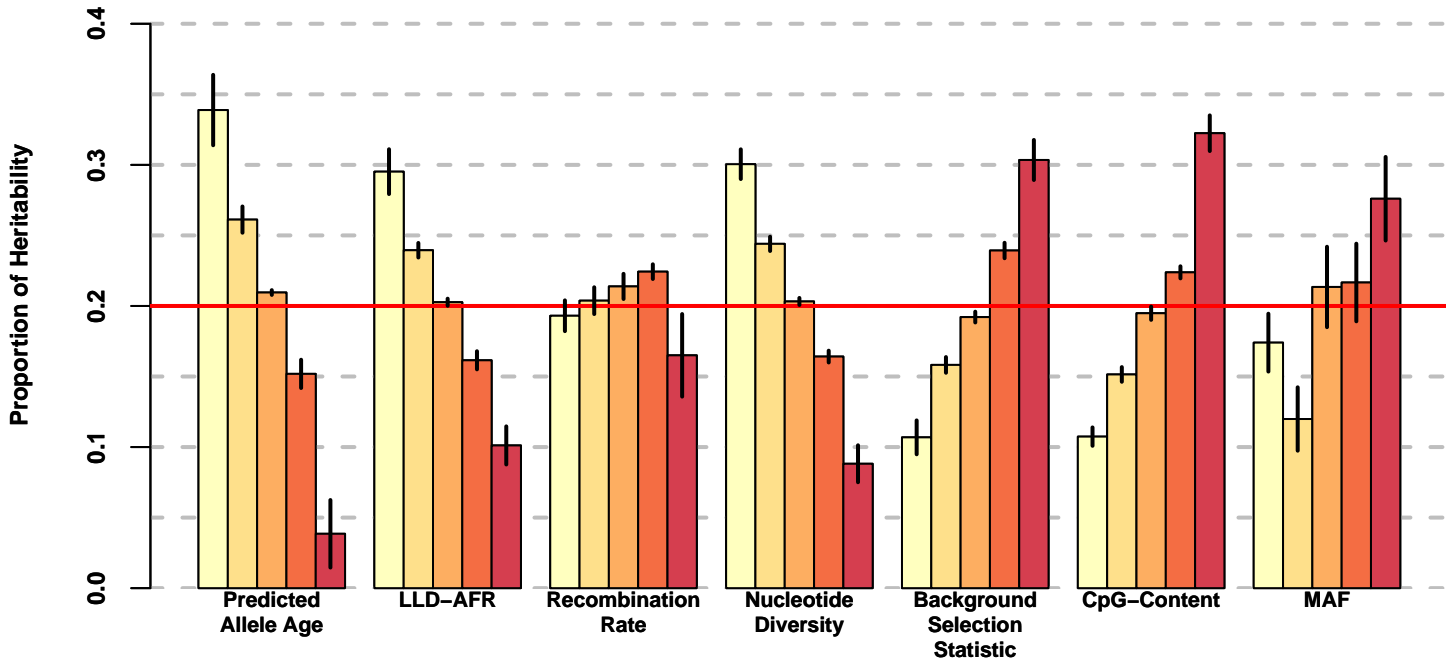

# Inflammatory bowel disease

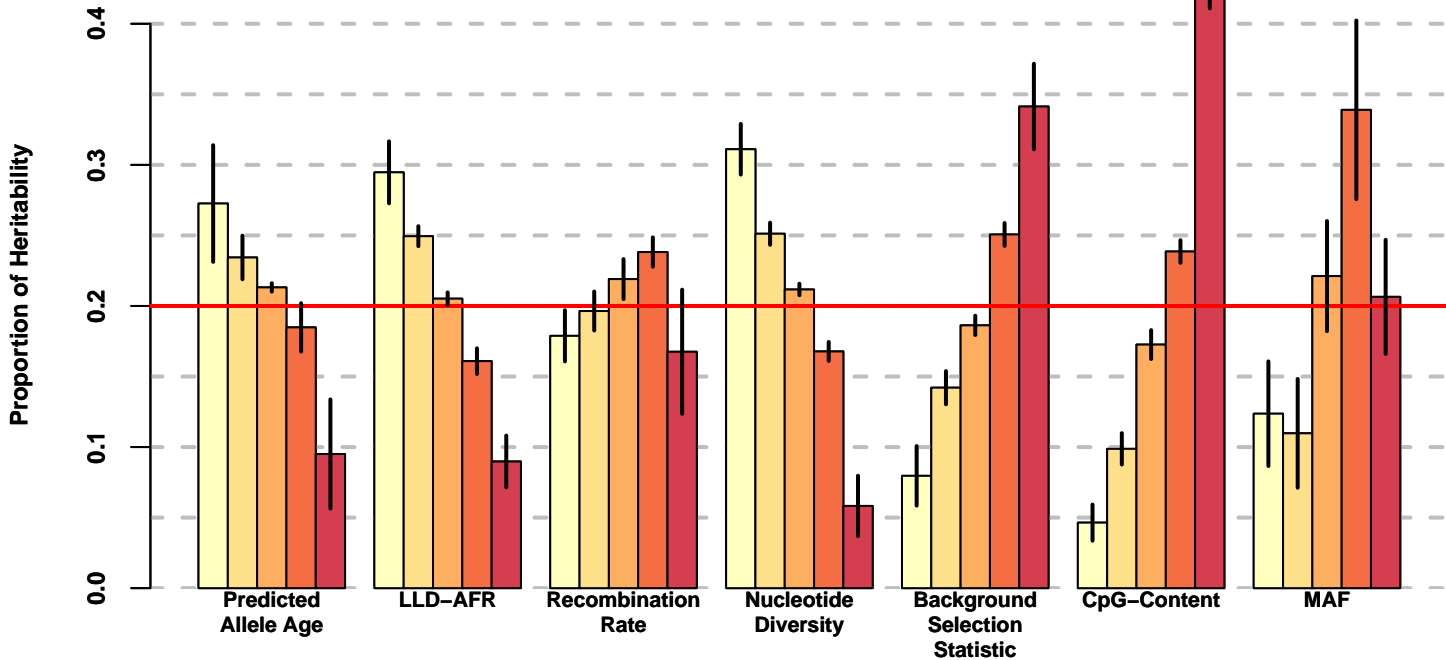

# LDL

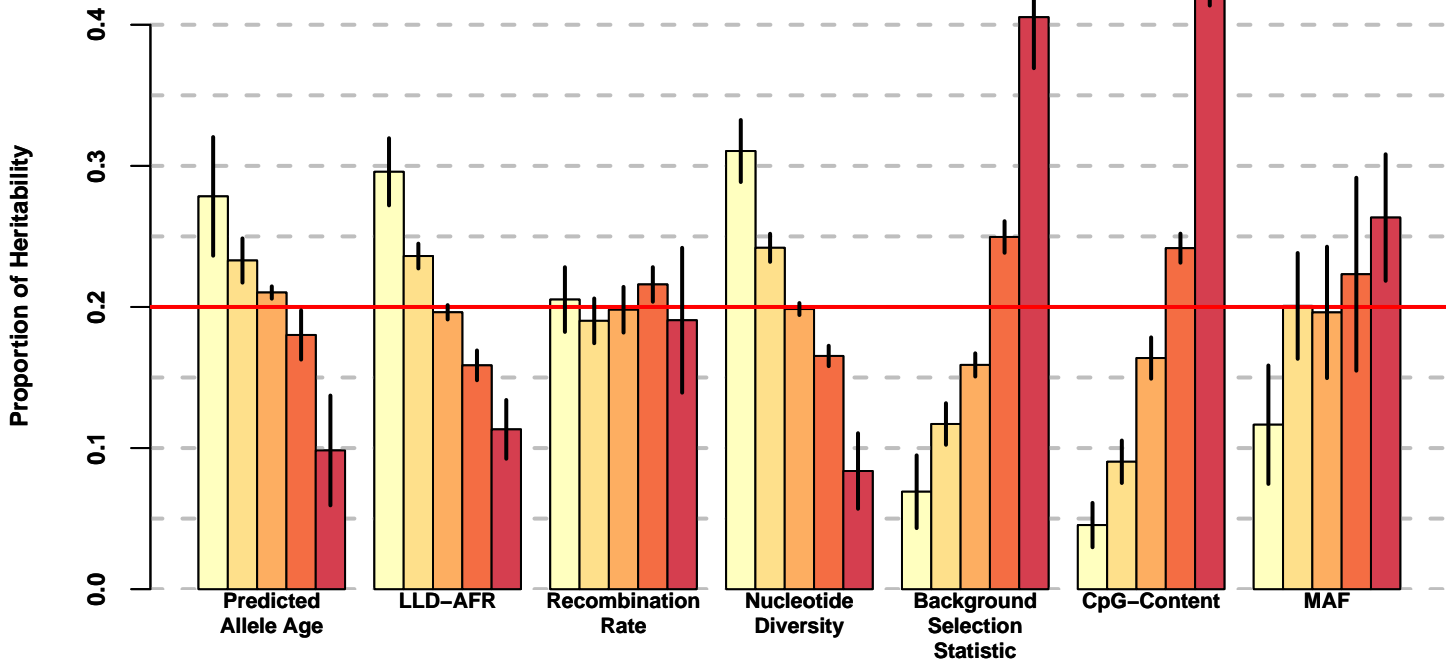

# Lung FEV1/FVC ratio

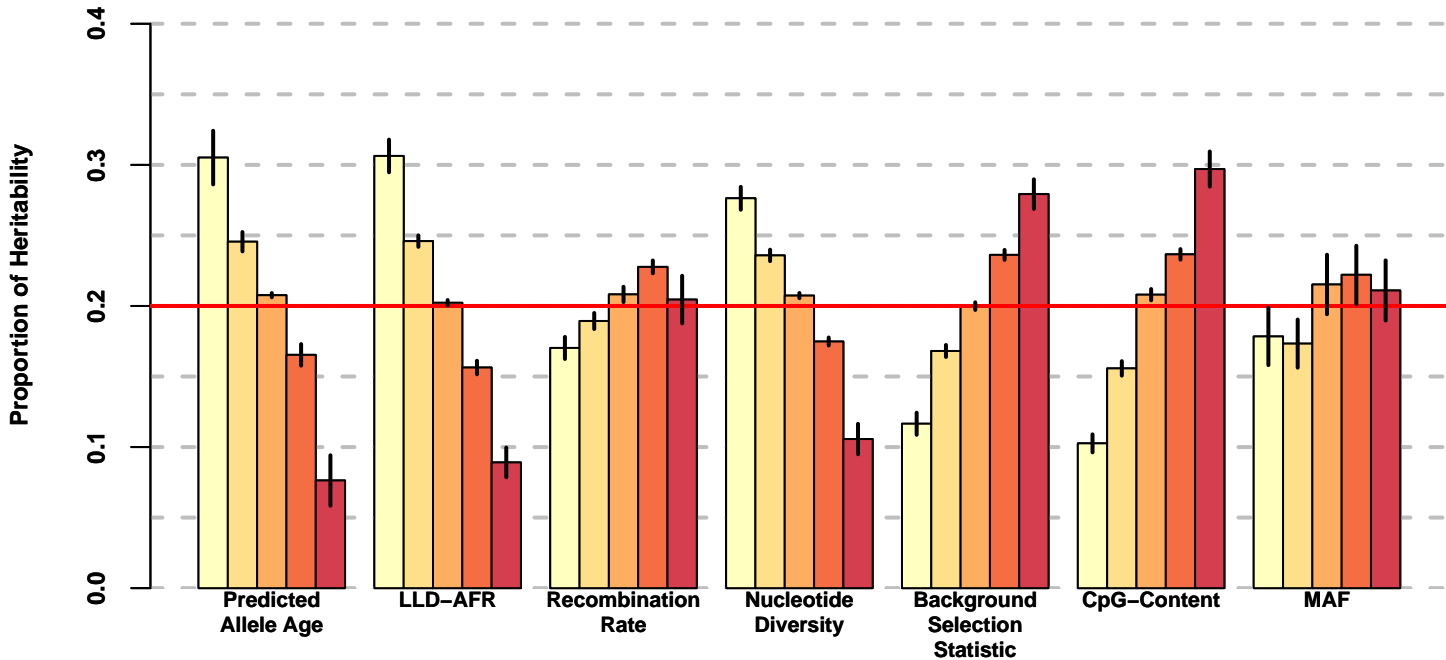

# Lung Forced Expiratory Volume

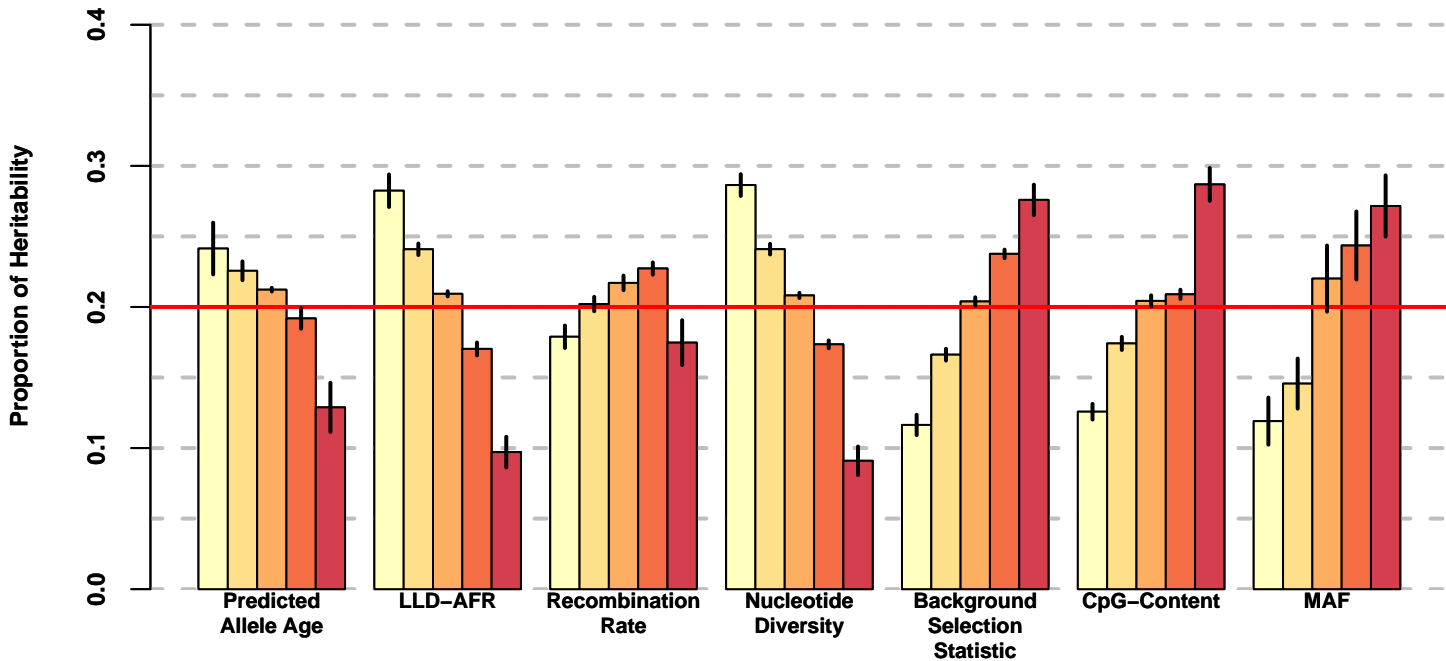

# Male age voice deepened

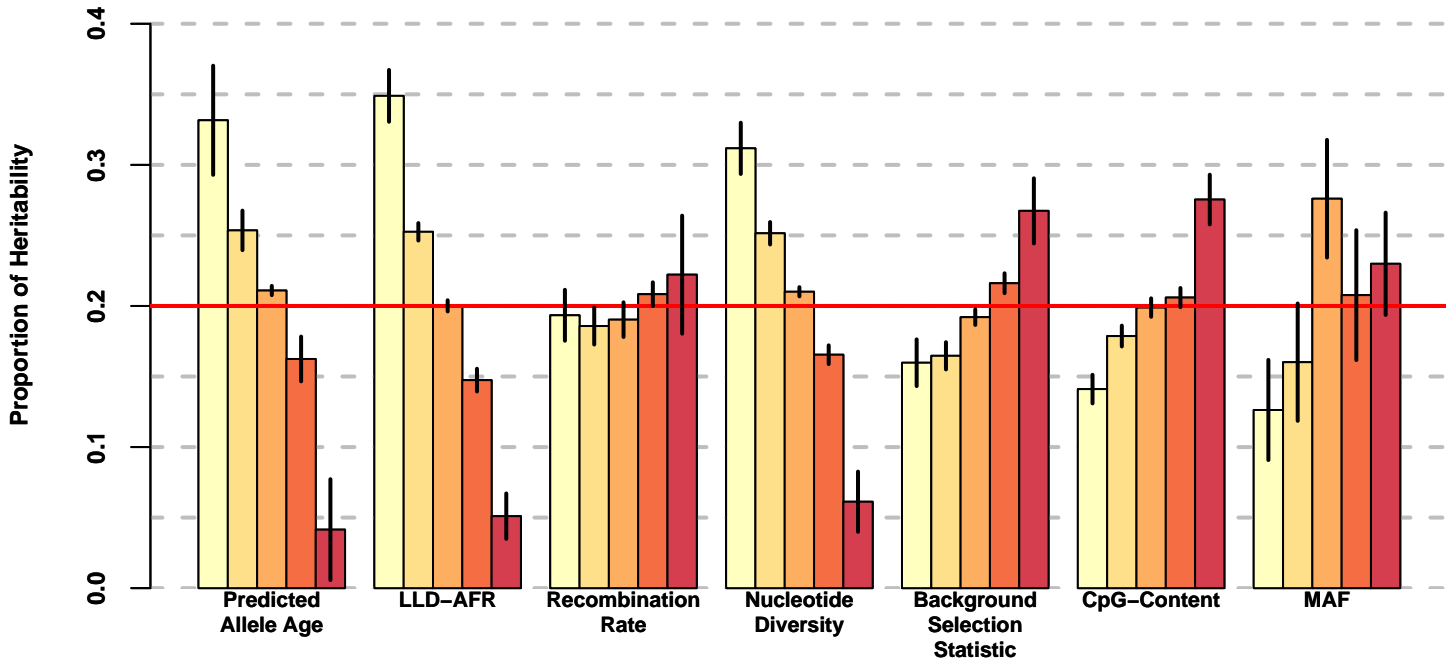



# Male back hair

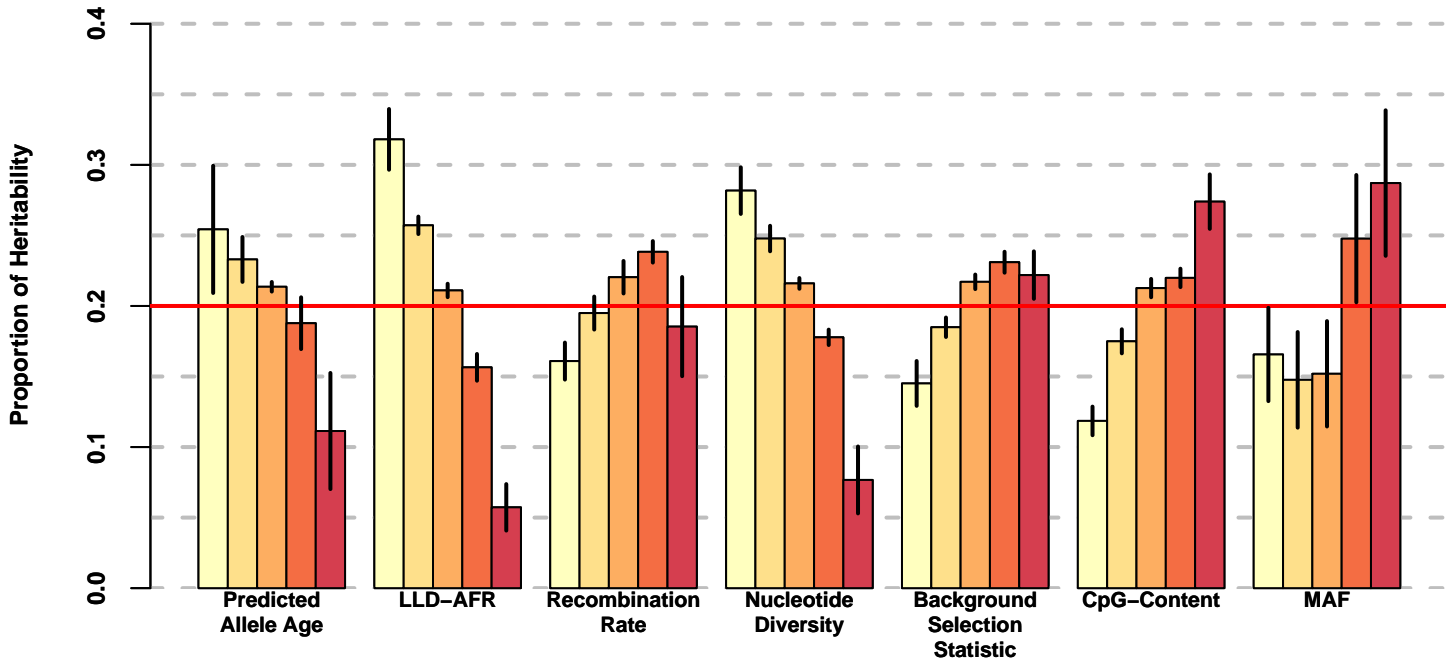

# Male facial stubble

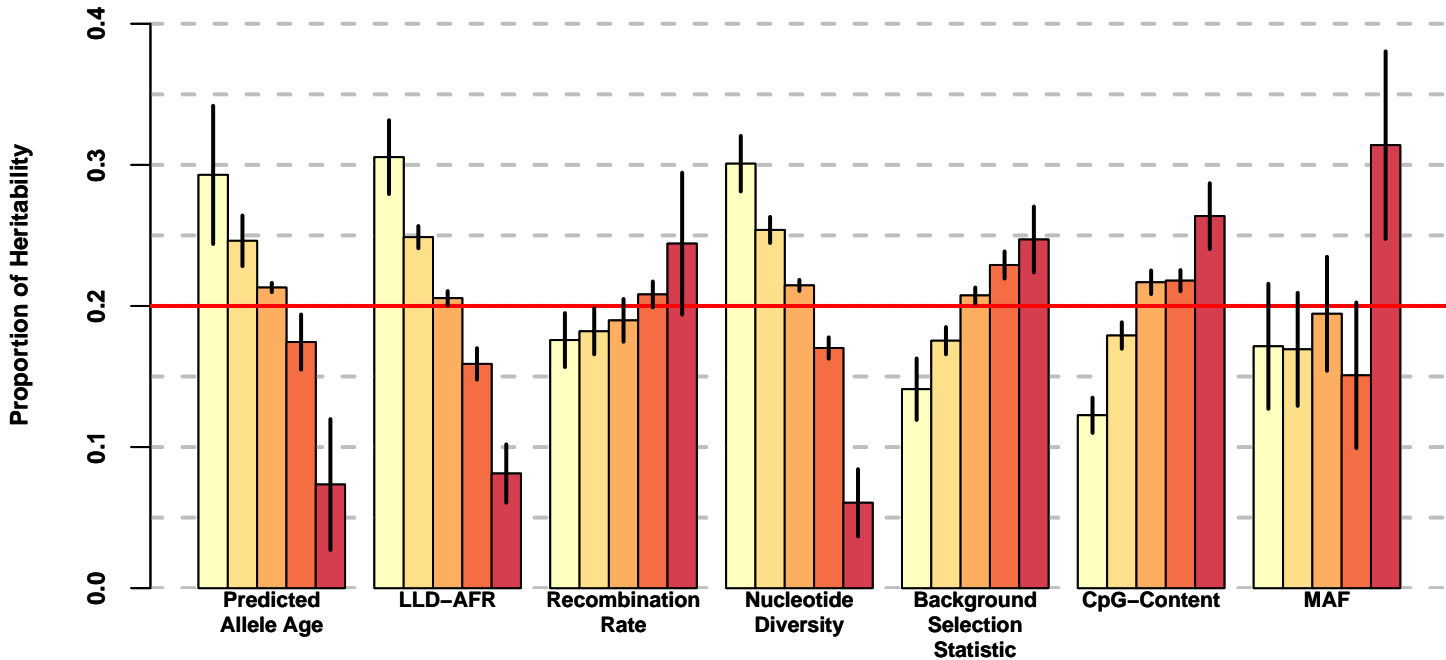

# Male pattern baldness

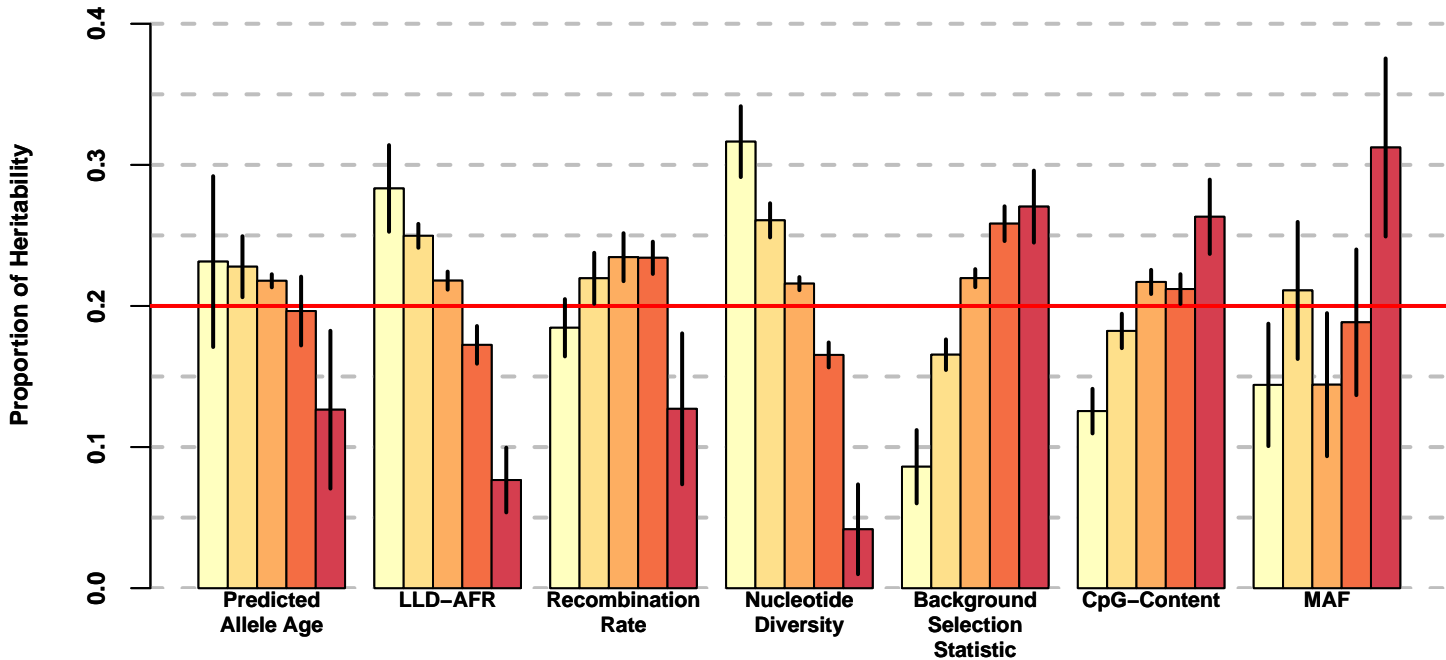

# Motion sickness

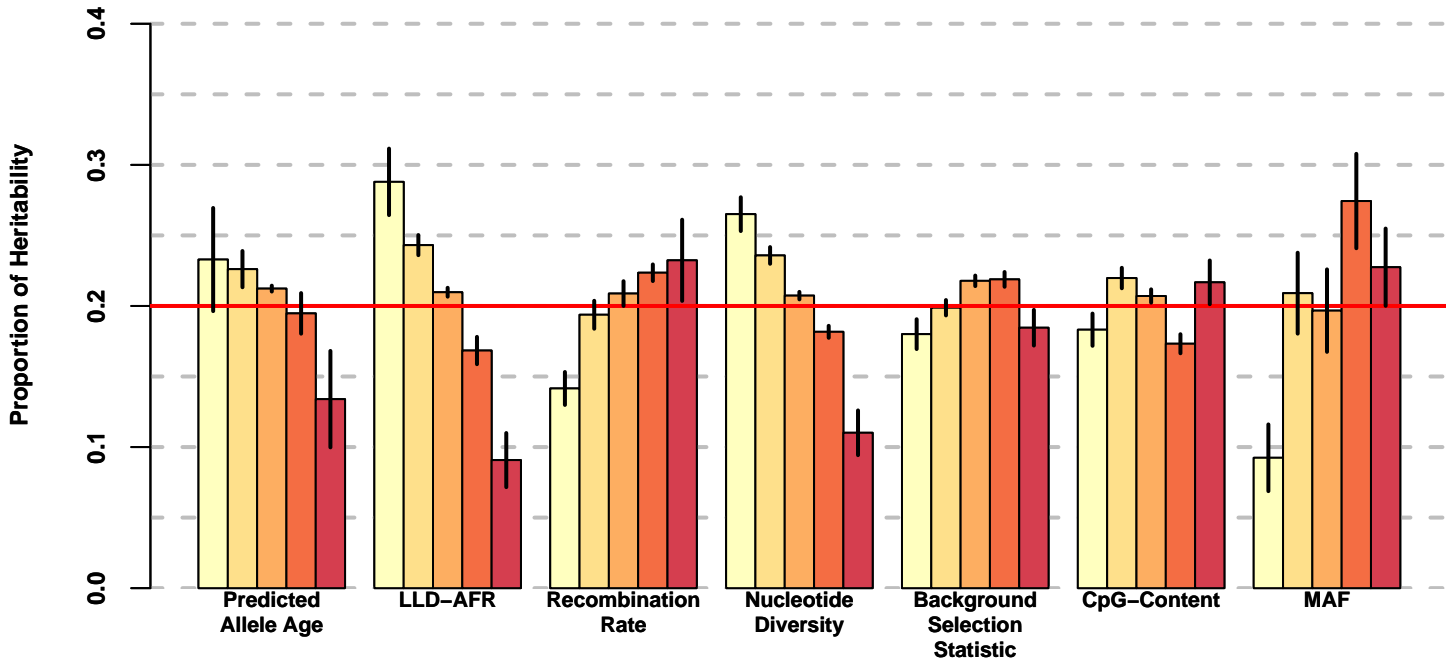

# Neuroticism

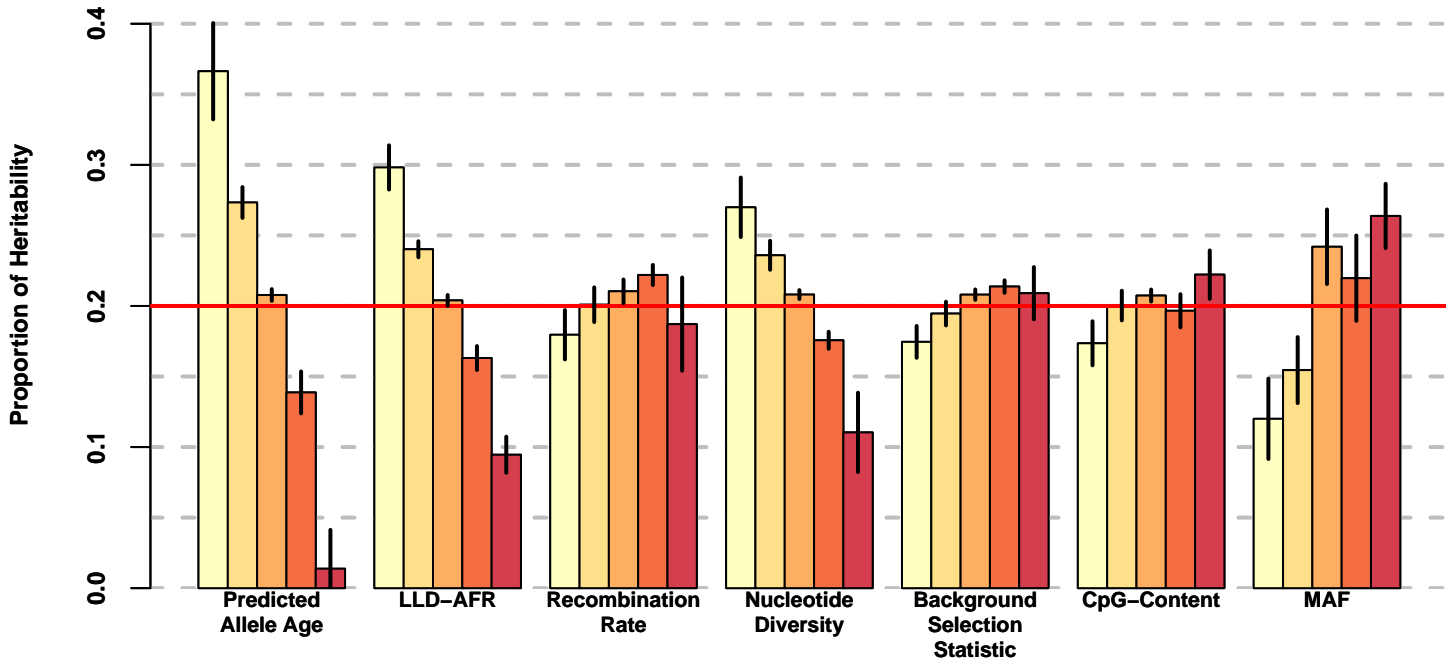

# Nose size

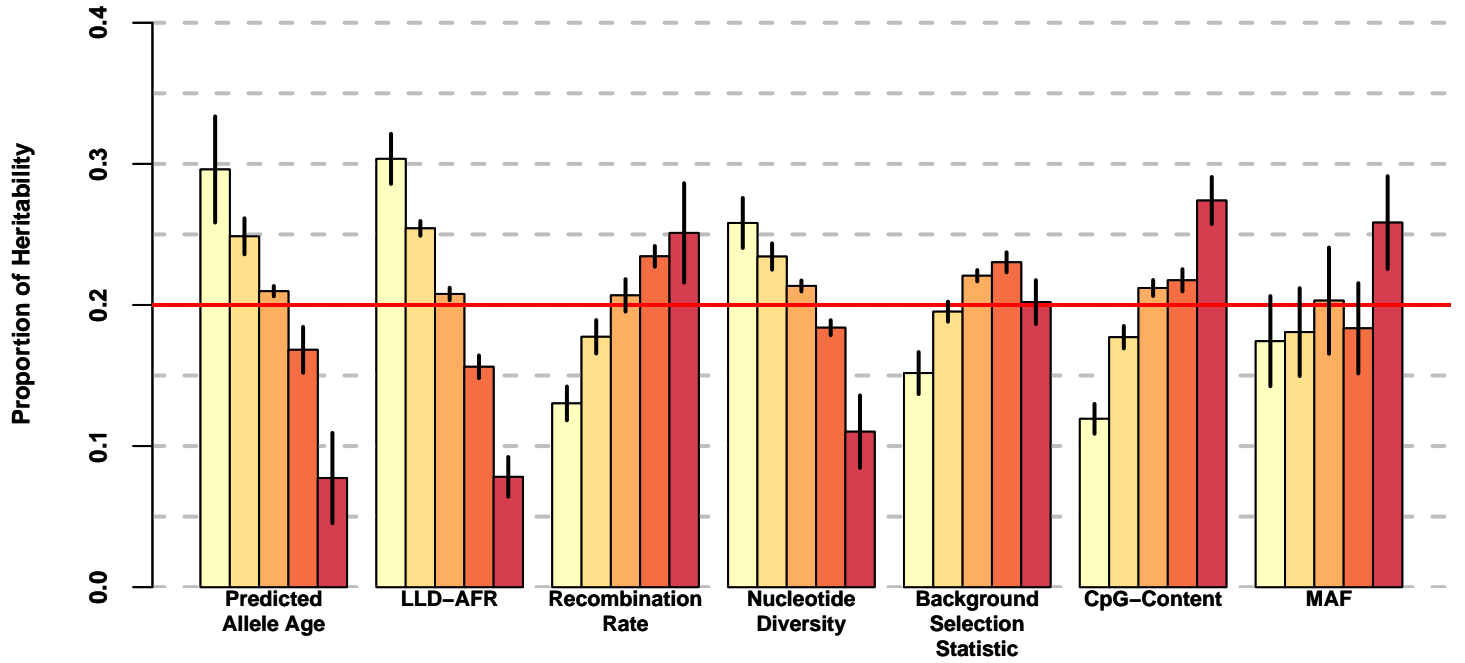

# Primary Biliary Cirrhosis

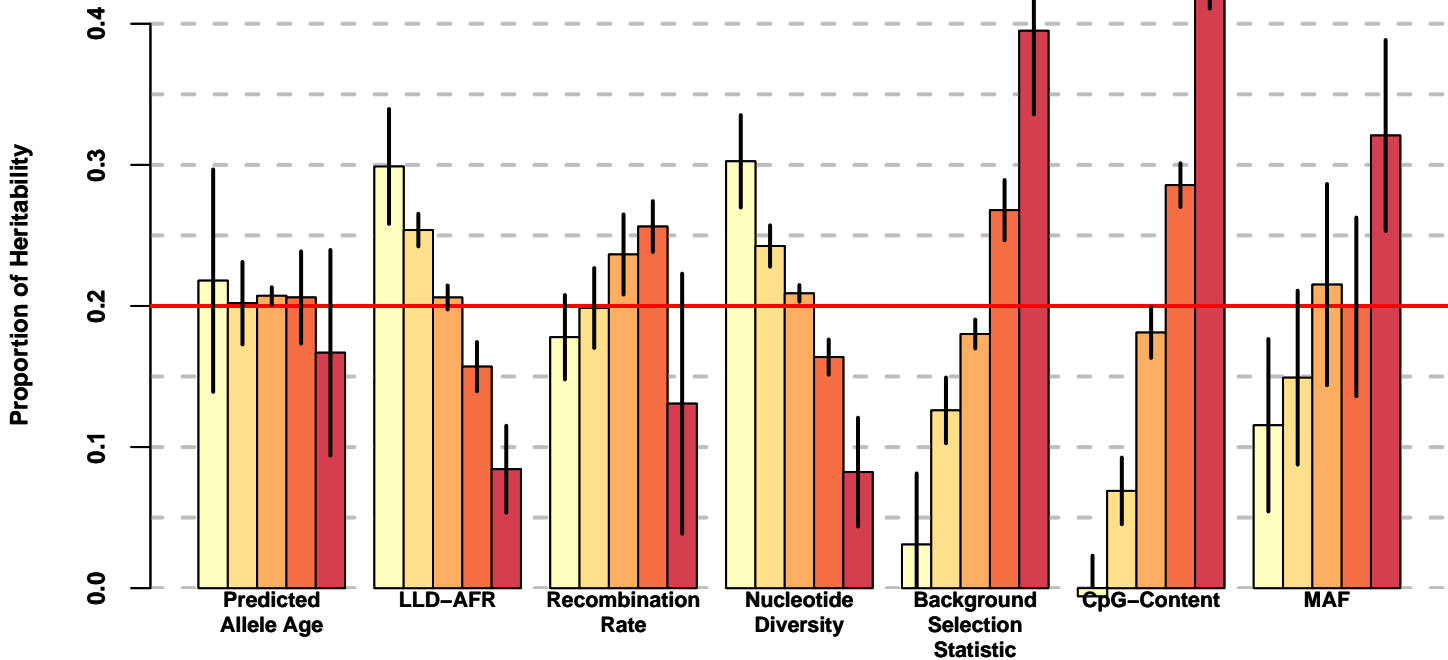

# Putamen Volume

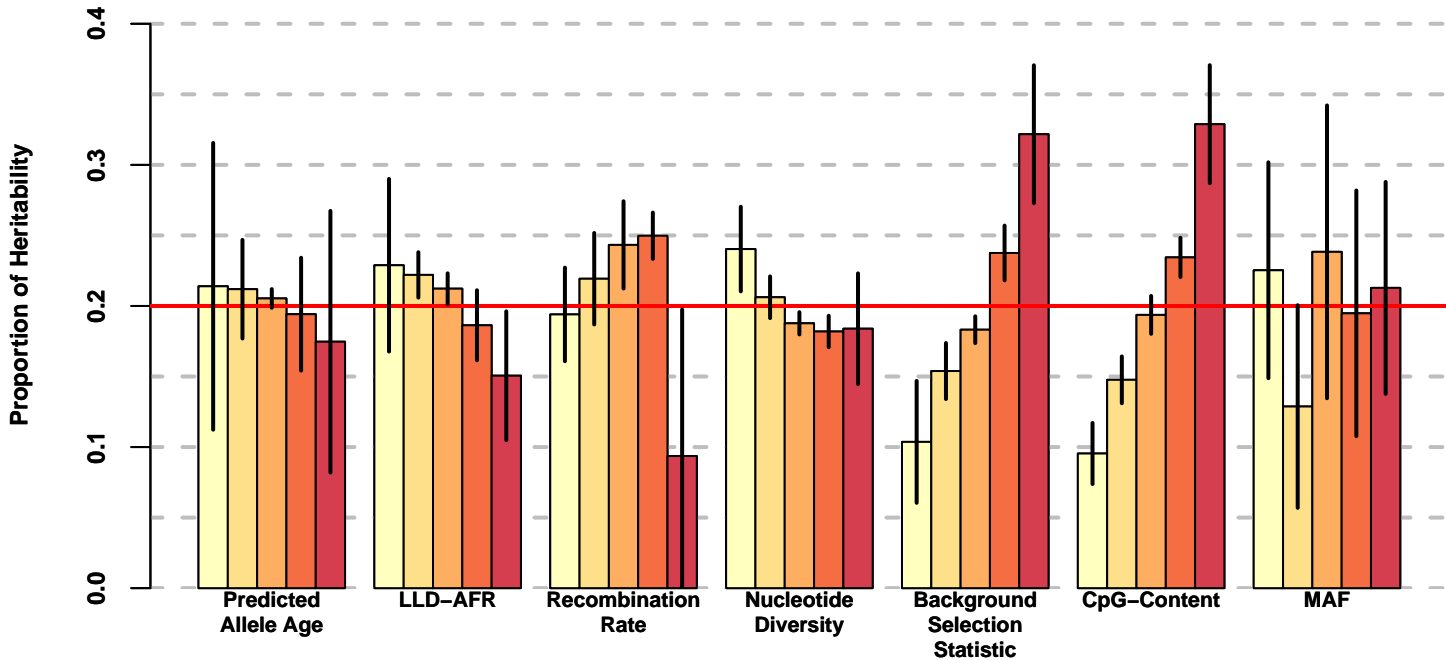



# Rheumatoid Arthritis

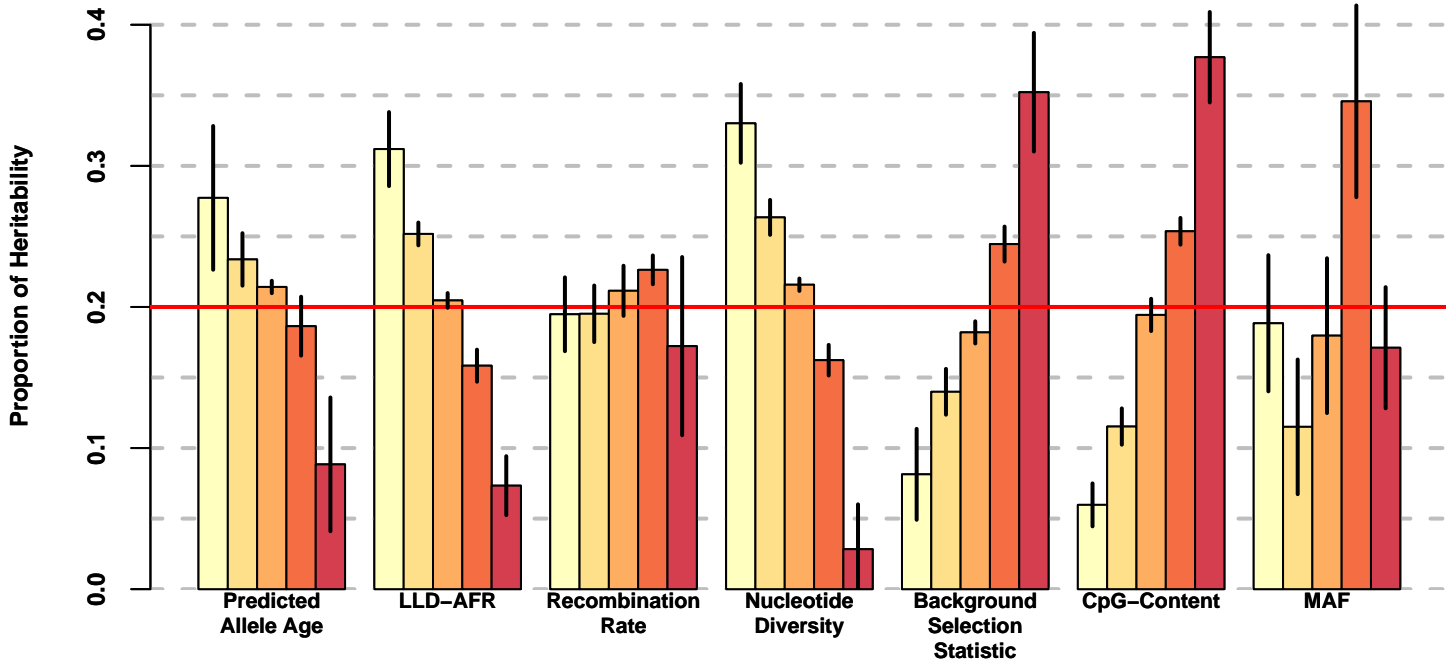

# Schizophrenia

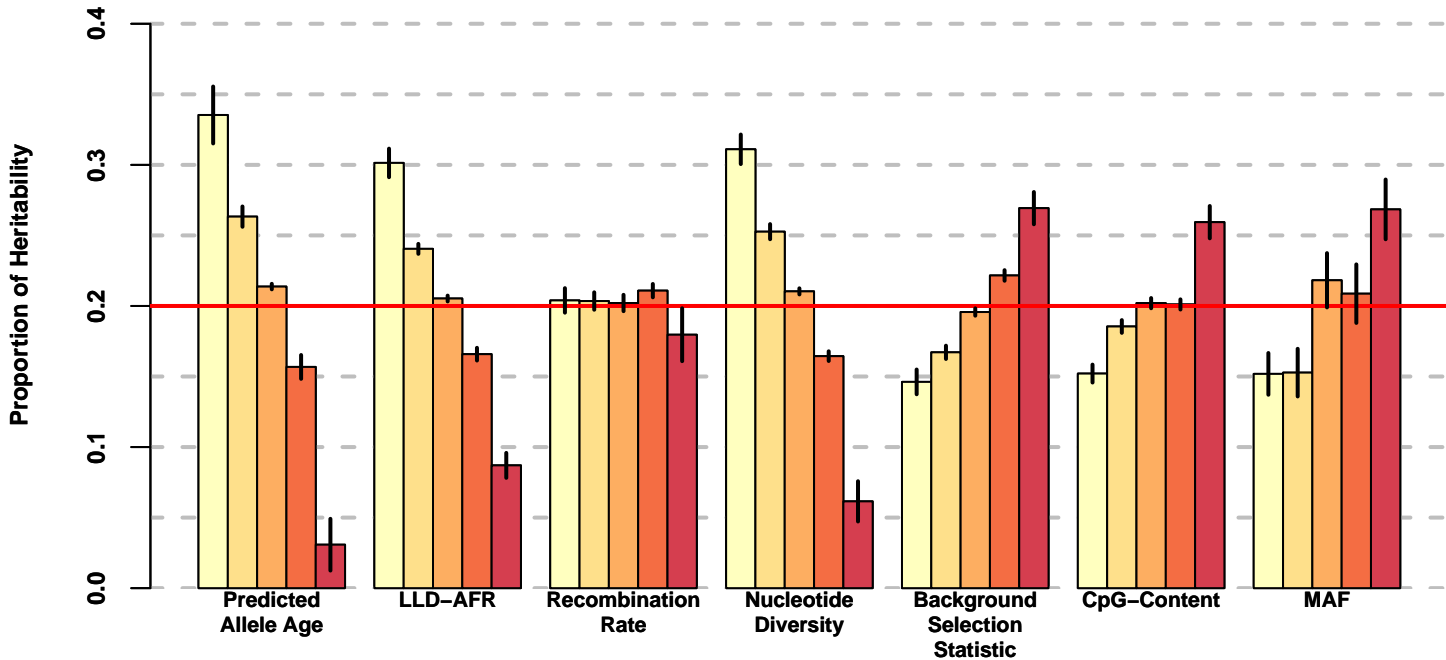

# Shoe size

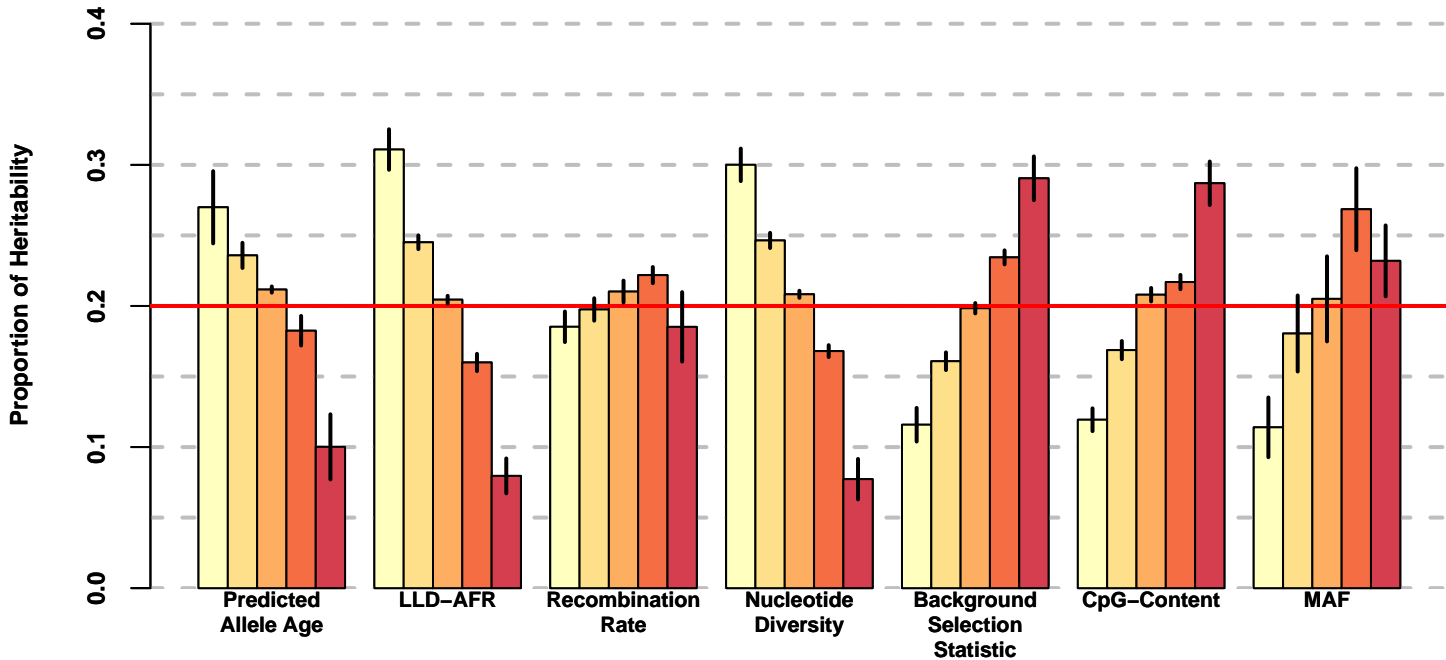

# Smoking Status

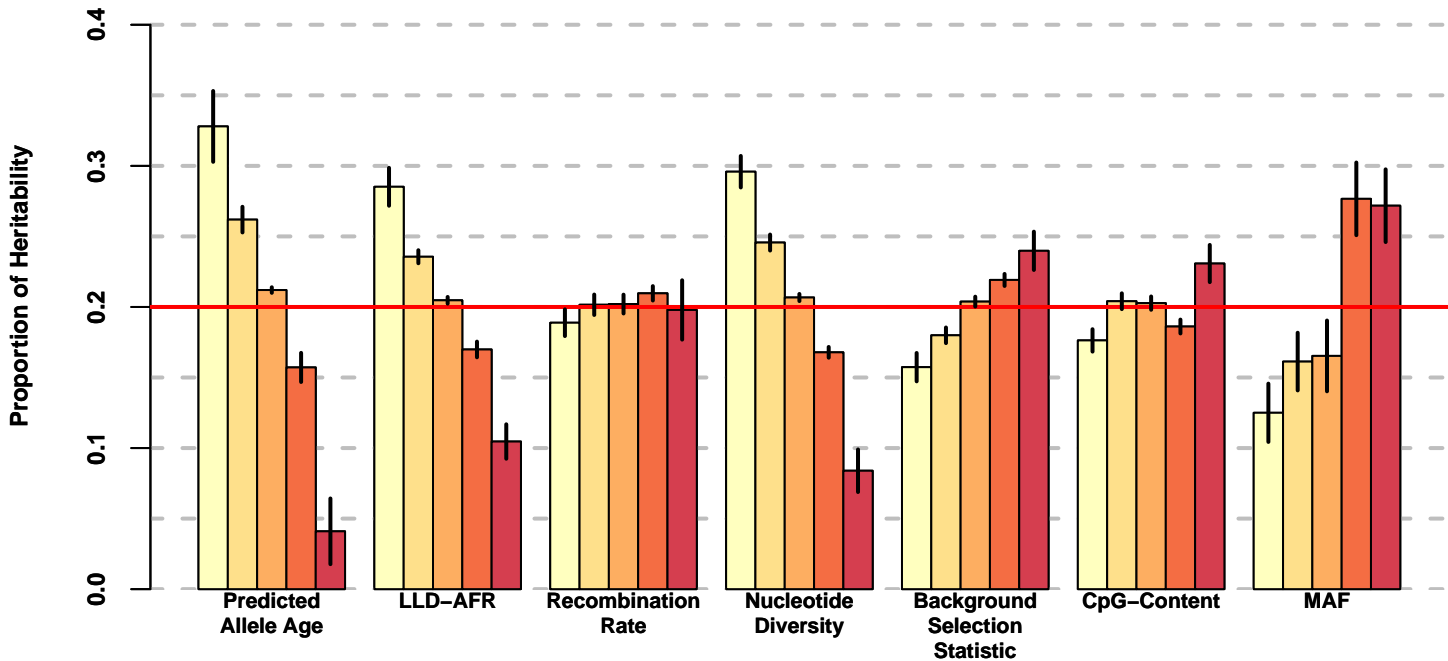

# Subject well being

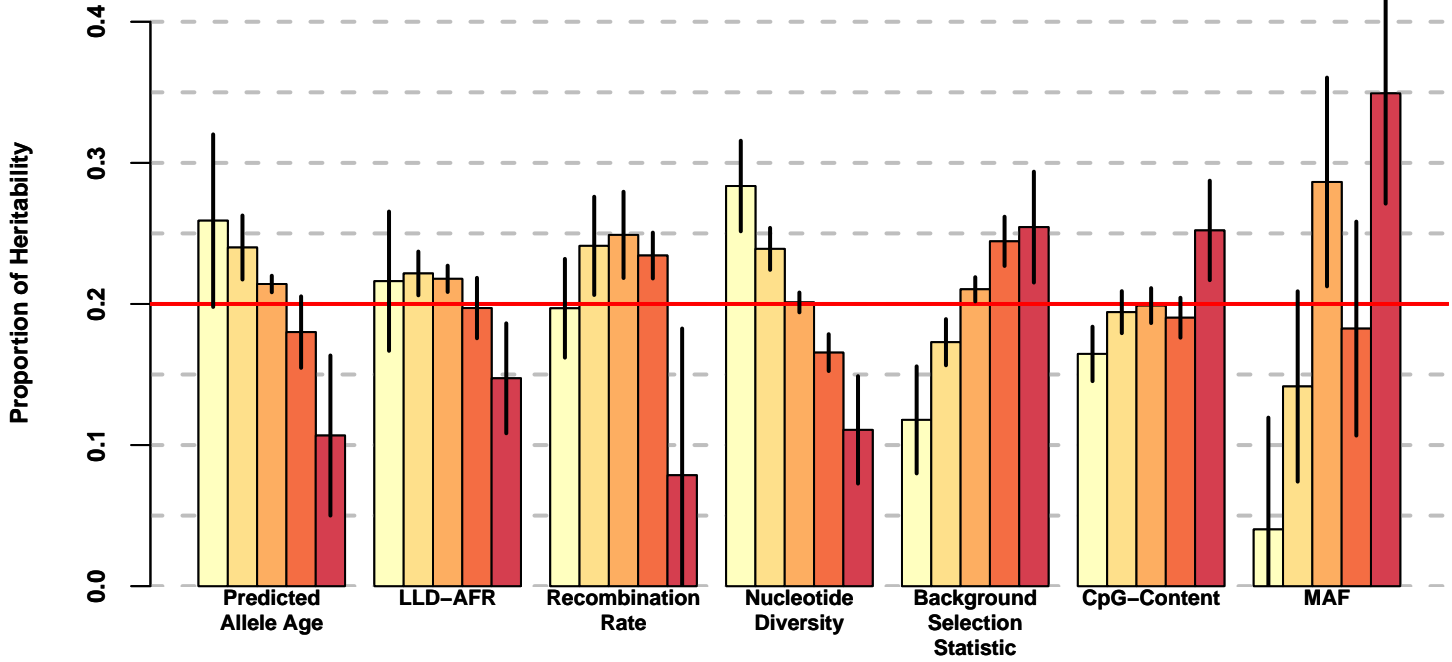

# Systemic Lupus Erythematosus

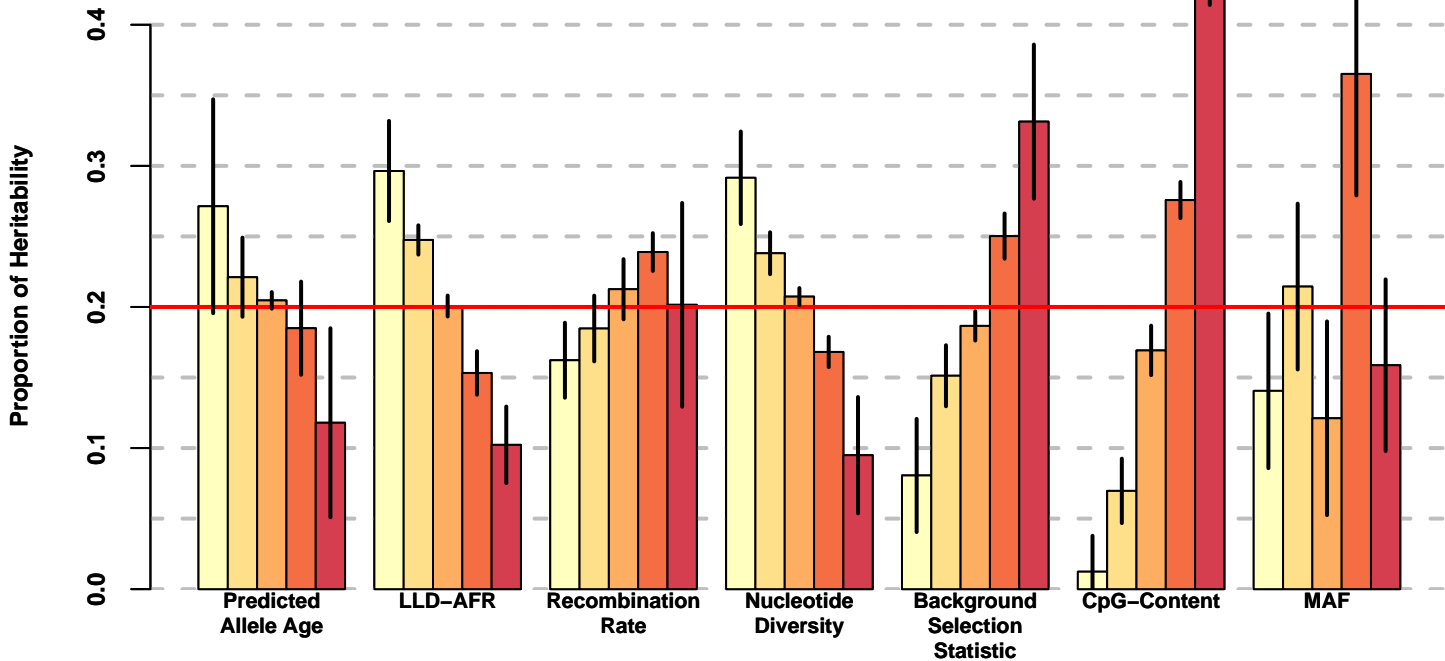

# Triglycerides

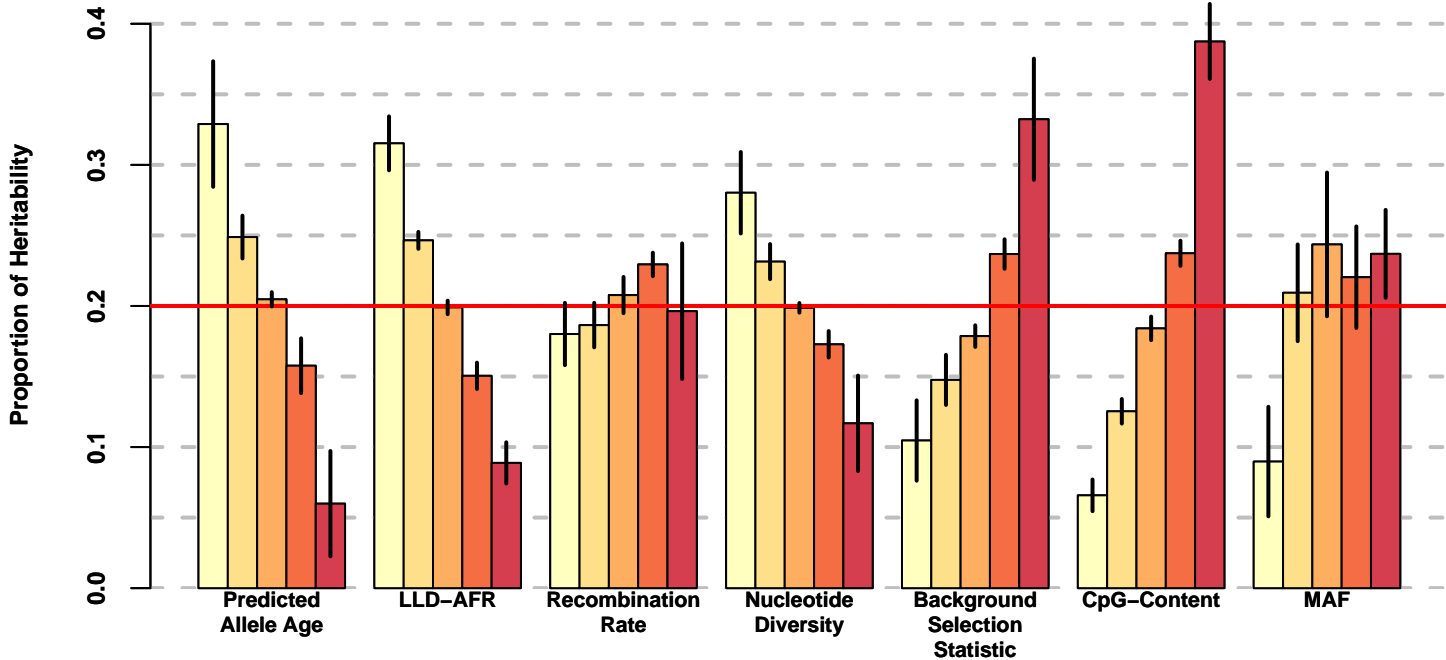

# Type 2 Diabetes

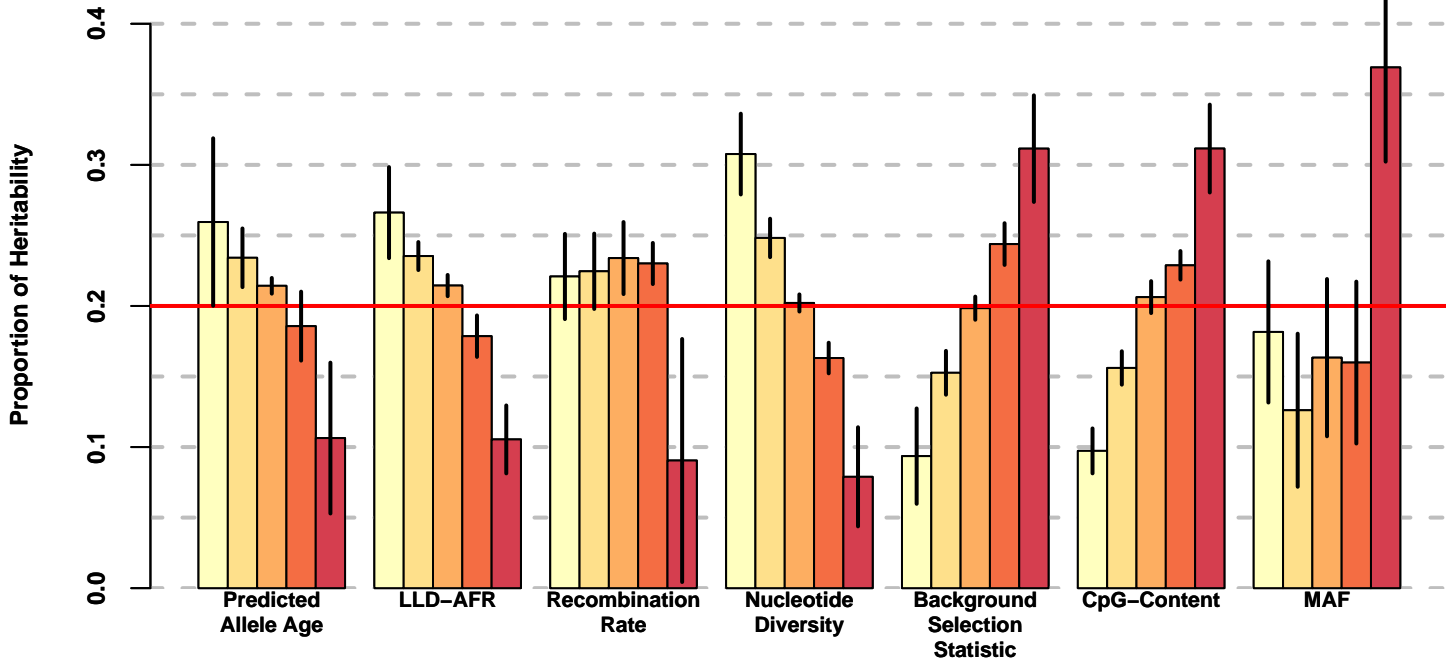



# Ulcerative Colitis

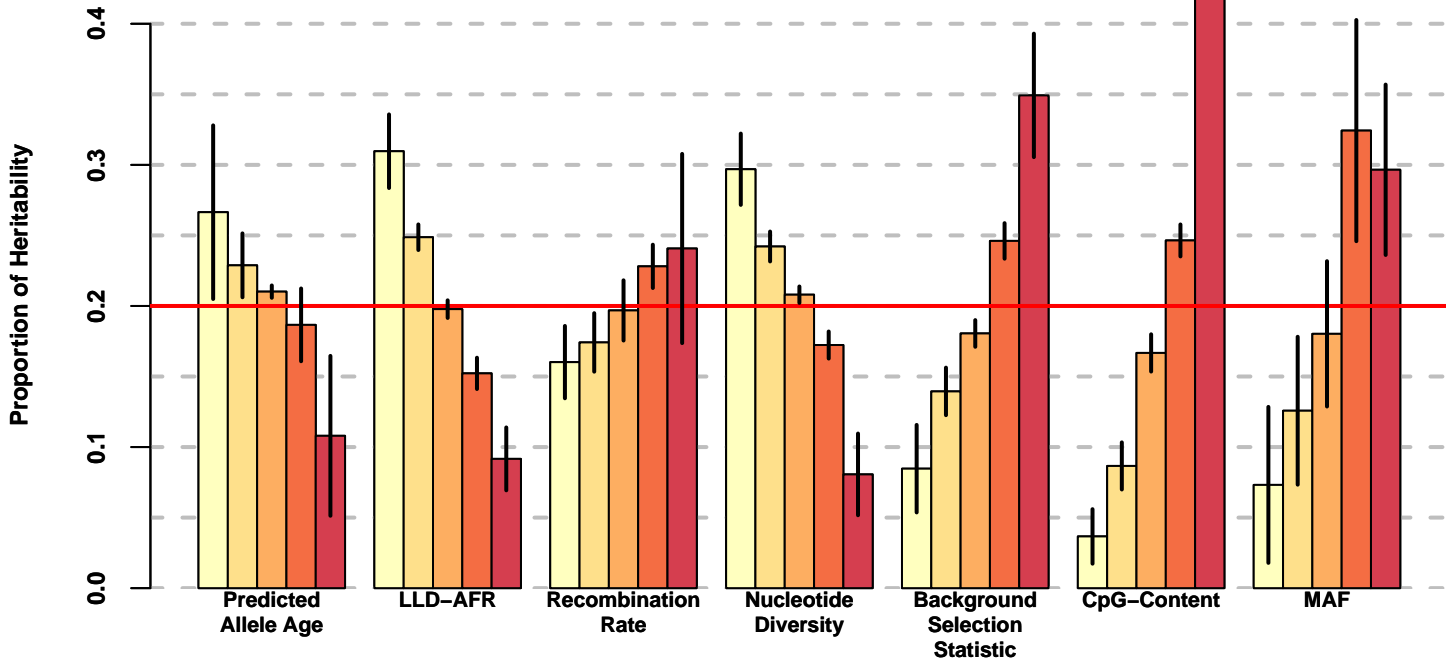

# Unibrow

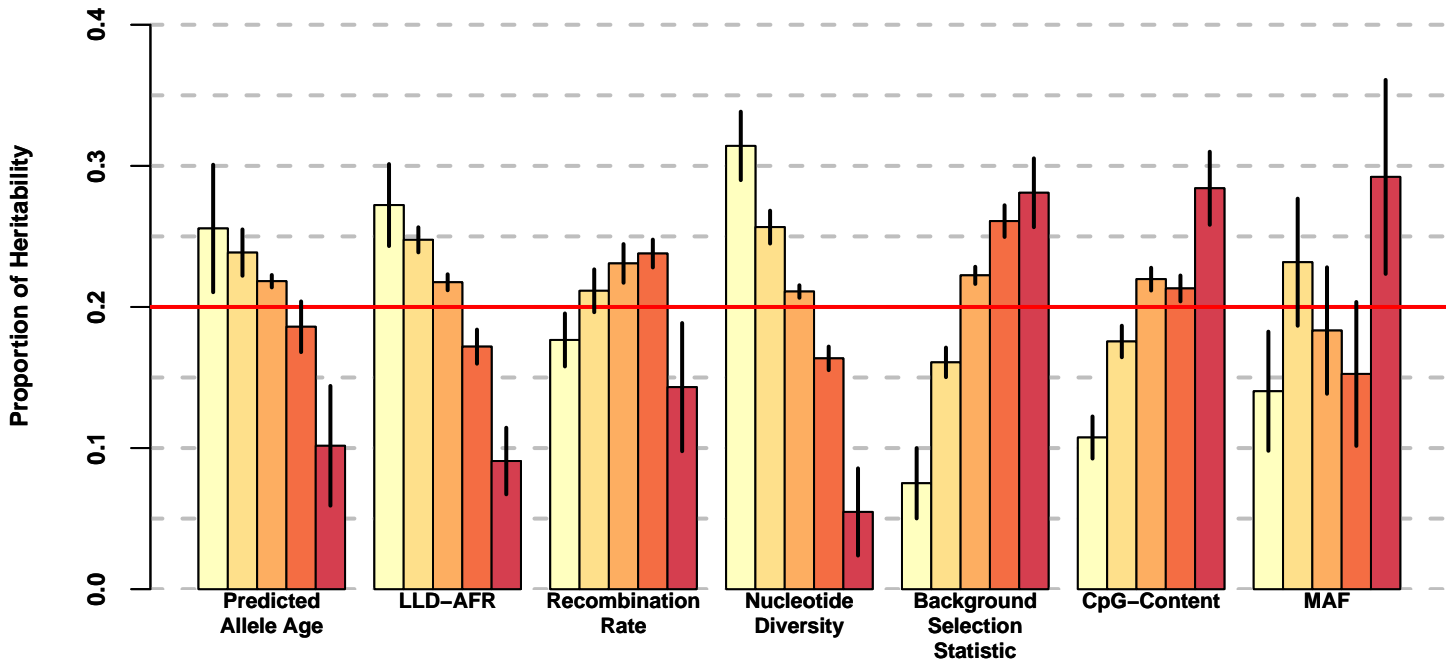

## Waist-hip ratio (BMI adjusted)

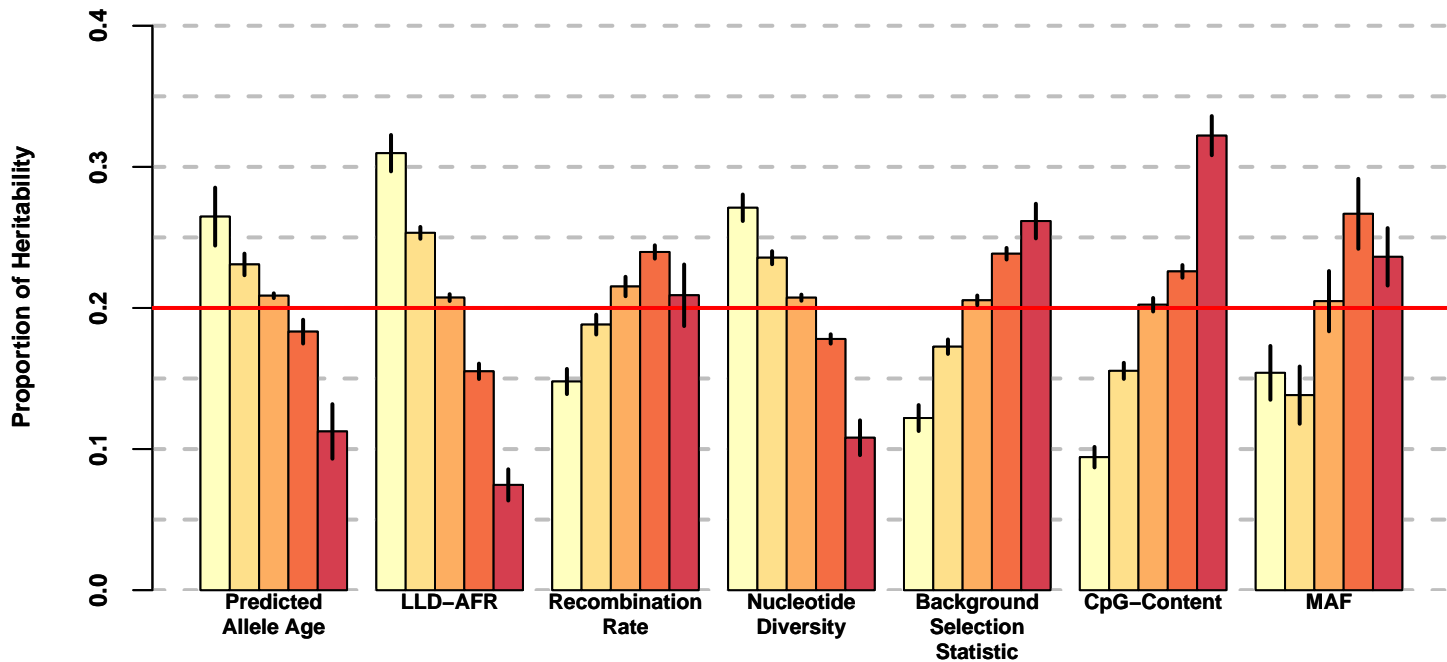

# Widow's peak

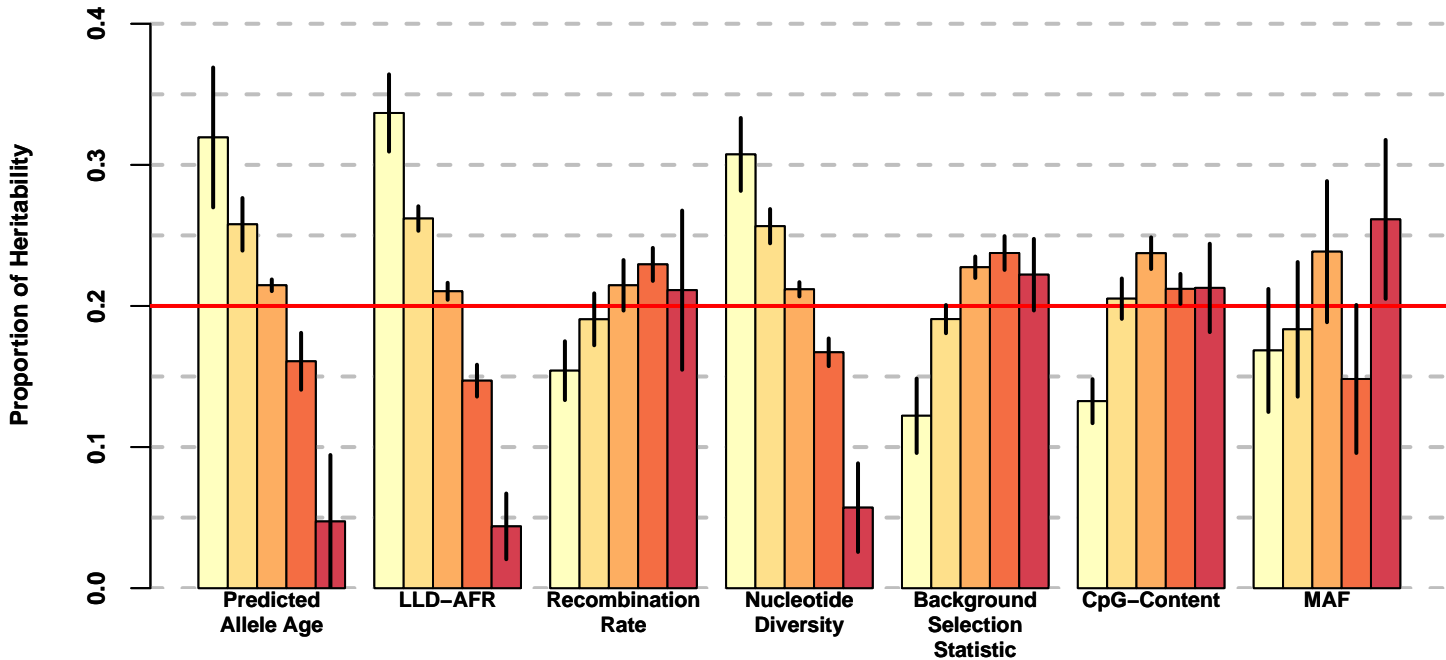

# Years of Education (Okbay 2016)

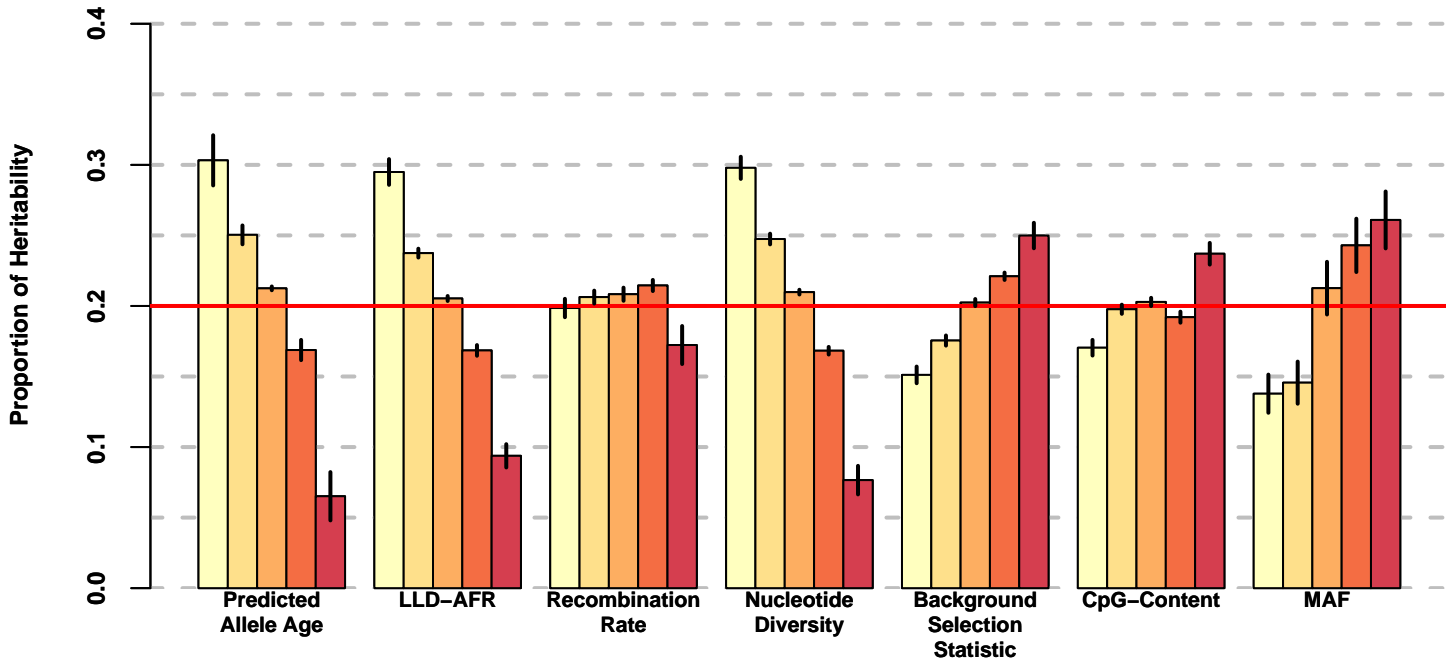

# Years of Education (Rietveld 2013)

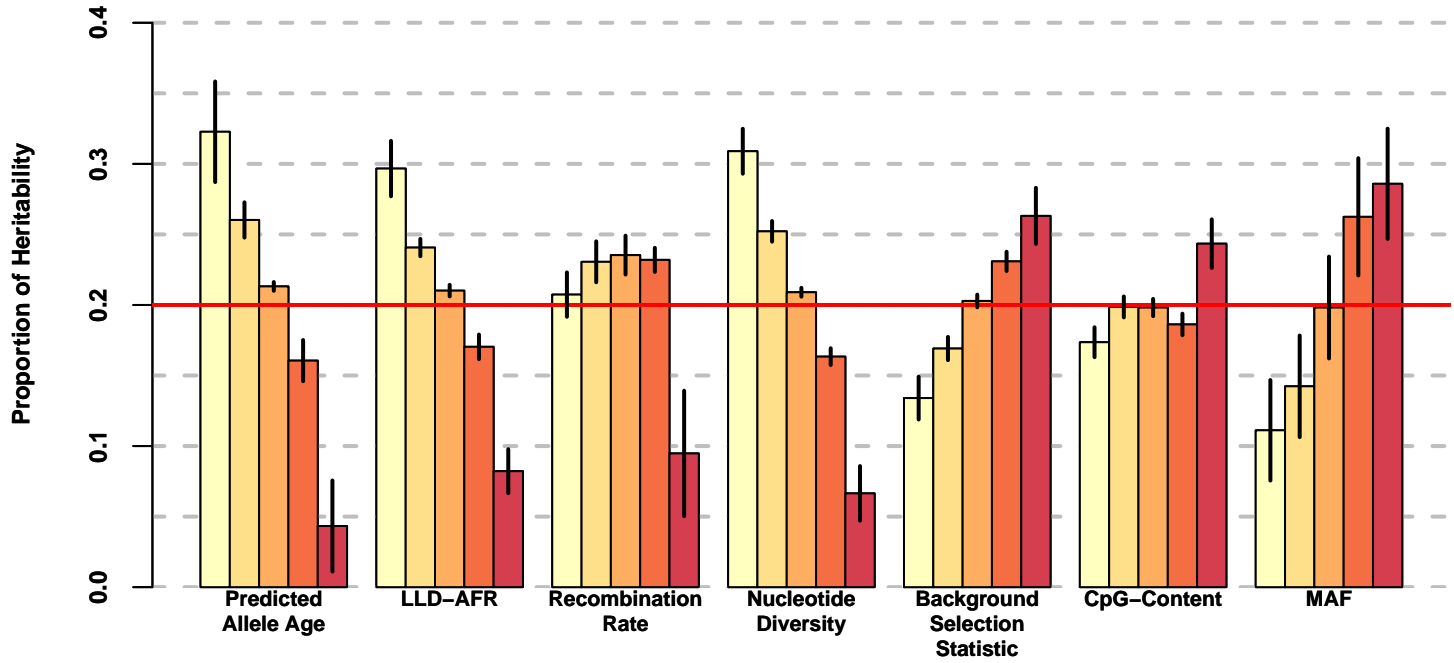

Supplement: NIHMS912999-supplement-supplemental_figure.pdf [file NIHMS912999-supplement-supplemental_figure.pdf]
